# Supplementary material
Source: PubMed Central journal article supplement (PMC3707551)
Supplement: supp_pp.113.215020_215020revsupp.pdf [file supp_pp.113.215020_215020revsupp.pdf]

# Supplemental Data

## Supplemental Figure S1

**A**

```

GmBCH1  MGDGSSSHLLAGEHKHSLFASWRNSIEAIYPSMAAGLPTAAI LKPY-NLVQPP---IPLSKPTT----SUFNPL 72
GmBCH3  -----MAAGLSTAAI LKPY-NLVQPP---IPLSKPTT----SUFNPL 35
GmBCH2  -----MAAGLSAAITMKSL-LRFHQPHLNLPKSIPTT----UPFSM 42
GmBCH4  -----MAAGLSTAAI LKPY-NLQPP---IPLSKPTT----PPUFNPL 35
GmBCH5  -----MAAGLSAAITMKPL-LRFHQPR--LPKPIPTT----UPFSPL 35
CaCRTR-B -----MAAGLVAAGAGQTV-CFRVNSFLT---RKPFSLVADSLTSLPL 39
AtCHY1  -----MAAGLSTAVTFKPLHRSESSSSTDFRLRLPKSLSG---FSPS 43
    
```

```

GmBCH1  RCFHSTILRVRPRRRM-SGFTVCVLTETSK---EIKTVEQE-QEQVIP-----QAVSAGVAEKLARKRSORFT 139
GmBCH3  RCFHSTILRVRPRRRM-SGFTVCVLTETSK---EIKTVEQE-QEQVIP-----QAVSAGVAEKLARKRSORFT 99
GmBCH2  RIFHHTASPRTQ---KVSTFTVCVLMQDPK---GTHMEIEPQEQPPPPPPPAQQVLSPKIAEKLARRESERFT 106
GmBCH4  RCFRSTILRVRPRRRM-SGFTVCVLTETDPK---EIKKDEQE-QEQVNP-----QVVSARVAEKLARKRSORFT 99
GmBCH5  RIFHHTASPIPQ---NFSTFTVCVLMQDPK---GTHMEIQEQ---PPSPPP-QQVLSQKIAEKLARRESERFT 100
CaCRTR-B AQQFSTT-----RRHRRKPRLTVCVLEDEELKAQLVTSBEEAREREKAM---AKRISDARVAEKLARRESERFT 110
AtCHY1  L-----RFRRESVGVVVEERR---NSPIENDERPESTSTNAIDAEYLALRLIAEKLARKRSERST 97
    
```

```

GmBCH1  YLVAAMSSFCITSMAVEAVYRFSWMEGCGDVPWSEMLGTFSLSVGAAVAMEFWARWAHRALWHASLWHEHESH 208
GmBCH3  YLVAAMSSFCITSMAVEAVYRFSWMEGCGDVPWSEMLGTFSLSVGAAVAMEFWARWAHRALWHASLWHEHESH 175
GmBCH2  YLVAAMSSFCITSMAVEAVYRFSWMEGCGEVPWSEMGTFALSVGAAVAMEFWARWAHRALWHASLWHEHESH 182
GmBCH4  YLVAAMSSFCITSMAVEAVYRFSWMEGCGDVPWSEMLGTFSLSVGAAVAMEFWARWAHRALWHASLWHEHESH 175
GmBCH5  YLVAAMSSFCITSMAVEAVYRFSWMEGCGEVPWSEMGTFALSVGAAVAMEFWARWAHRALWHASLWHEHESH 176
CaCRTR-B YLVAAMSSFCITSMAVEAVYRFSWMEGCGEVPWSEMGTFALSVGAAVAMEFWARWAHRALWHASLWHEHESH 182
AtCHY1  YLVAAMSSFCITSMAVEAVYRFSWMEGCGEISLMEGTFALSVGAAVAMEFWARWAHRALWHASLWHEHESH 173
    
```

```

GmBCH1  RPRGPFELNDVEAIIINAVPAIALLSYCFEFKGLVPGLCFAGLGITVFCIAYMEVHDGLVHKRFPVGPPIANVPYF 284
GmBCH3  RPRGPFELNDVEAIIINAVPAIALLSYCFEFKGLVPGLCFAGLGITVFCIAYMEVHDGLVHKRFPVGPPIANVPYF 251
GmBCH2  RPRGPFELNDVEAIIINAVPAIALLSYCFEFKGLVPGLCFAGLGITVFCIAYMEVHDGLVHKRFPVGPPIANVPYL 258
GmBCH4  RPRGPFELNDVEAIIINAVPAIALLSYCFEFKGLVPGLCFAGLGITVFCIAYMEVHDGLVHKRFPVGPPIANVPYF 251
GmBCH5  RPRGPFELNDVEAIIINAVPAIALLSYCFEFKGLVPGLCFAGLGITVFCIAYMEVHDGLVHKRFPVGPPIANVPYL 252
CaCRTR-B RPRGPFELNDVEAIIINAVPAIALLSYCFEFKGLVPGLCFAGLGITVFCIAYMEVHDGLVHKRFPVGPPIANVPYF 258
AtCHY1  RPRGPFELNDVEAIIINAVPAIALLSYCFEFKGLVPGLCFAGLGITVFCIAYMEVHDGLVHKRFPVGPPIANVPYL 249
    
```

```

GmBCH1  RRVAAAHQ LHHSEKFNCPYGLFLGPKVEEVGCEELEKEISRRIRSGS----- 334
GmBCH3  RRVAAAHQ LHHSEKFNCPYGLFLGPKVEEVGCEELEKEISRRIRSGS----- 301
GmBCH2  RRVAASAHQ LHHSEKFNCPYGLFLGPKVEEVGCEELEKEISRRARSYKIANENN---- 314
GmBCH4  RRVAAAHQ LHHSEKFNCPYGLFLGPKVEEVGCEELEKEISRRIRSGS----- 301
GmBCH5  RRVAASAHQ LHHSEKFNCPYGLFLGPKVEEVGCEELEKEISRRARSYKIAREKS---- 308
CaCRTR-B RRVAAAHQ LHHSEKFNCPYGLFLGPKVEEVGCEELEKEISRRIRSGS----- 310
AtCHY1  RRVAASAHQ LHHSEKFNCPYGLFLGPKVEEVGCEELEKEISRRIRSGSYKASGSGSSSS 251
    
```

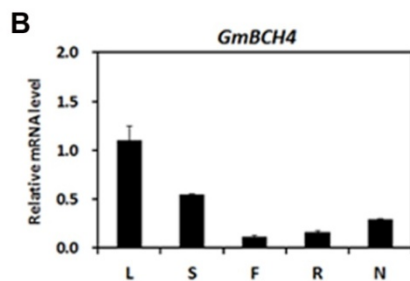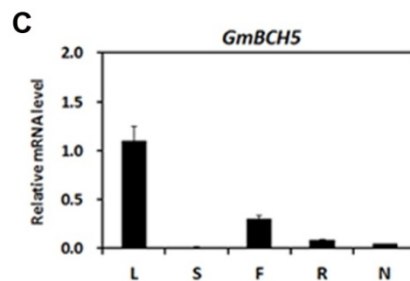

D

|            |                                                                |     |
|------------|----------------------------------------------------------------|-----|
| GmZEP1     | YATILLCYNLSL--PSTTVFSTRHESVPLNKELELDASLFFVVGYNCGVGRIRKQRKKVMH  | 58  |
| GmZEP2     | -----MAVFSKTHESLMLKELSLDLSFCVSV-----HGSRLTKQRNTLMP             | 40  |
| GmZEP3     | YASILLCNSFN--HSMVAFSKHESLIMYKELSLDLSFCVSV-----YGSRLTKQRKTLMQ   | 53  |
| Gm09g00260 | YAS-----VQLCCTCQVQLQGSIRRYVDYGYF---HHHDKISKHRYYSIRV            | 45  |
| PA-ZE      | YASILLYNSML--LSAAVFSRTHSPIDLNKOFFLDFSLFCIH-IDYHLRSRDRSGQKCLF   | 57  |
| AtABA1     | YGSILPFCYSILPSPSKLDFRTHVFSVSKQFMIDLSLFSG-KPGGVSG-PRS-RRALLG    | 57  |
|            |                                                                |     |
| GmZEP1     | VKCAVVEAIPGVSPSAKDGNG-----TTPSKKQIRLVAGGGIGGLVFALAARKGFEV      | 112 |
| GmZEP2     | IKASVAEVPVAVRKTVDENEGGGD---GASQKKLRVLVAGGGIGGLVFALAARKGFEV     | 97  |
| GmZEP3     | IKATVAEIPGVVKTIVVSENGGGDGAPOKRRKLRVLVAGGGIGGLVFALAARKGFEV      | 113 |
| Gm09g00260 | VDSGNEMVLSNLE-----EERKLRVLVAGGGIGGLVFALAARKGFEV                | 89  |
| PA-ZE      | EVRRATVASITEVPSAP-----ASTQPKLRVLVAGGGIGGLVFALAARKGFEV          | 106 |
| AtABA1     | VKAATALVYKEEKREA-----VTEKRRKLRVLVAGGGIGGLVFALAARKGFEV          | 106 |
|            |                                                                |     |
| GmZEP1     | MVFEKDLISAIRGEGQYRGP IQIQSNLAALAEADLSEVADEVMRVGCITGDRINGLVDGVS | 172 |
| GmZEP2     | VVFEKDLISAIRGEGQYRGP IQIQSNLAALAEADLSEVADEVMRVGCITGDRINGLVDGVS | 157 |
| GmZEP3     | -----GQYRGP IQIQSNASADLEADLSEVADEVMRVGCITGDRINGLVDGVS          | 160 |
| Gm09g00260 | KVFEKDLISAVRGEGRHRGPTQLLSALAVLEITDQSVARQIWEAGCVTANRNGIADGLS    | 149 |
| PA-ZE      | VVFEKDLISAVRGEGRHRGPTQLLSALAVLEITDQSVARQIWEAGCVTANRNGIADGLS    | 166 |
| AtABA1     | IVFEKDLISAIRGEGQYRGP IQIQSNLAALAEADLSEVADEVMRVGCITGDRINGLVDGVS | 166 |
|            |                                                                |     |
| GmZEP1     | GSWYVKDFTFPTAVERGLP VTRVISRMLVQLQILARAVGEDITMNASNVVNEVDDGKQVTV | 232 |
| GmZEP2     | GSWYVKDFTFPTAVERGLP VTRVISRMLVQLQILARAVGEDITMNASNVVNEVDDGKQVTV | 217 |
| GmZEP3     | GSWYVKDFTFPTAVERGLP VTRVISRMLVQLQILARAVGEDITMNASNVVNEVDDGKQVTV | 220 |
| Gm09g00260 | GDWFSVDFTFPTASRKRLEPTIVICRMLVQLQILVNRVGSNIHNRKSRVDFIQEENKVRV   | 209 |
| PA-ZE      | GSWYVKDFTFPTAVERGLP VTRVISRMLVQLQILARAVGEDITMNASNVVNEVDDGKQVTV | 226 |
| AtABA1     | GSWYVKDFTFPTAVERGLP VTRVISRMLVQLQILARAVGEDITMNASNVVNEVDDGKQVTV | 226 |
|            |                                                                |     |
| GmZEP1     | ELENGQRYEGDILVVGADGIWSKVRQLFGLTEAVYSGYTCYTG IADFVPADIESVGYRVE  | 292 |
| GmZEP2     | ELENGQRYEGDILVVGADGIWSKVRKLFQTEAVYSGYTCYTG IADFVPADIESVGYRVE   | 277 |
| GmZEP3     | ELENGQRYEGDILVVGADGIWSKVRKLFQTEAVYSGYTCYTG IADFVPADIESVGYRVE   | 280 |
| Gm09g00260 | ILENGEQHDDLLIGADGIWSKVRKLFQTEAVYSGYTCYTG IADFVPADIESVGYRVE     | 269 |
| PA-ZE      | ILENGQRYEGDILVVGADGIWSKVRQLFGLTEAVYSGYTCYTG IADFVPADIESVGYRVE  | 286 |
| AtABA1     | VLENGQRYEGDILVVGADGIWSKVRQLFGLTEAVYSGYTCYTG IADFVPADIESVGYRVE  | 286 |
|            |                                                                |     |
| GmZEP1     | LGHKQYFVSDVGGKMQWYAFHKESP GGVDSPNGKKERLEKIFEGWCDN--AVDILLAT    | 350 |
| GmZEP2     | LGHKQYFVSDVGGKMQWYAFHKESP GGVDSPNGKKERLEKIFEGWCDN--VIDILHAT    | 335 |
| GmZEP3     | LGHKQYFVSDVGGKMQWYAFHKESP GGVDSPNGKKERLEKIFEGWCDNRQFDELYHT     | 340 |
| Gm09g00260 | LGLLQYFVSDVGGKMQWYAFHKESP SDPFSPGKKERLEKIFEGWCDN--VIALISEH     | 327 |
| PA-ZE      | LGHKQYFVSDVGGKMQWYAFHKESP GGVDSPNGKKERLEKIFEGWCDN--VIDILLAT    | 344 |
| AtABA1     | LGHKQYFVSDVGGKMQWYAFHKESP GGVDSPNGKKERLEKIFEGWCDN--VIDILHAT    | 344 |
|            |                                                                |     |
| GmZEP1     | EEBAILRRDIYDRITLFWGKGRVTLGDSVHAMQPNMGQGGCMAIEDSYQLALELDEAW     | 410 |
| GmZEP2     | EEBAILRRDIYDRITLFWGKGRVTLGDSVHAMQPNMGQGGCMAIEDSYQLALELDEAW     | 395 |
| GmZEP3     | SPQHLHGE RAVSPCHVILSNPQSQIWA NEDARLLRPNK-----VQDSYQLALELDEAW   | 394 |
| Gm09g00260 | PEHMLIQRDIDYRDHINHWGIGRVTLLGDAAHPMQPNMGQGGCMAIEDSYQLALELDEAW   | 387 |
| PA-ZE      | EEBAILRRDIYDRITLFWGKGRVTLGDSVHAMQPNMGQGGCMAIEDSYQLALELDEAW     | 404 |
| AtABA1     | EEBAILRRDIYDRITLFWGKGRVTLGDSVHAMQPNMGQGGCMAIEDSYQLALELDEAW     | 404 |
|            |                                                                |     |
| GmZEP1     | EQSIKSSSDPDI DSSLKSYERERRLRVAIHGMARMAAMMASTYKAYLGVGLGPISEFLTK  | 470 |
| GmZEP2     | QOSIKSSSDPDI DSSLKSYERERRLRVAIHGMARMAAMMASTYKAYLGVGLGPISEFLTK  | 455 |
| GmZEP3     | QRSIKSSSDPDI DSSLKSYERERRLRVAIHGMARMAAMMASTYKAYLGVGLGPISEFLTK  | 454 |
| Gm09g00260 | KHGS DGS---EVISALRRYKKNRPRVRLVITASRMASQMLVNRPMIEFKFVPIHSHVIT   | 444 |
| PA-ZE      | KKSSETITVDVWASLSLSYENSRRLRVAIHGMARMAAMMASTYKAYLGVGLGPISEFLTK   | 464 |
| AtABA1     | KQSVETITVDVWVSSLKRYEERRLRVAIHGMARMAAMMASTYKAYLGVGLGPISEFLTK    | 464 |
|            |                                                                |     |
| GmZEP1     | FRVHPGRVGGREFVDILMBSMLDVLGGNSKLEGRPLSCLTADKANQIHRWFEEDEA       | 530 |
| GmZEP2     | FRVHPGRVGGREFVDKIMBLMDNVLGGNSKLEGRPVCCRLSDKANQIHRWFEEDEA       | 515 |
| GmZEP3     | FRVHPGRVGGREFVDKIMBLMDNVLGGVAVDITVLSYELYSNE---ISVYLEIFP        | 511 |
| Gm09g00260 | MQIKRPGIHVAQALFKFTFQFVTRMIAQ-----RPSVIFN                       | 473 |
| PA-ZE      | FRVHPGRVGGREFVDKIMBLMDNVLGGNSKLEGRSPSCLTADKANQIHRWFEEDEA       | 524 |
| AtABA1     | FRVHPGRVGGREFVDILMBSMLDVLGGNSKLEGRPPSCLTADKANQIHRWFEEDEA       | 524 |
|            |                                                                |     |
| GmZEP1     | LERAINSEWILLDHCDGTGLSKPISLSRNEMKPTLCSAPMQDNSFSVVTSSPQVSPTH     | 590 |
| GmZEP2     | LERAINSEWILLDHCDGAGPTKPCITQDEMKPCHTSSMQQKHPSSSIIPLPQVSOQH      | 575 |
| GmZEP3     | MHRITGKLVGDLVR-----ILKDTWFECPKQ-----                           | 538 |
| Gm09g00260 | -----HCLW-----                                                 | 474 |
| PA-ZE      | LERAINSEWYITLCCQDNDASQLICINRDEKNPTLCSAPHGVSIISIAIPKPVSEM       | 584 |
| AtABA1     | LERITKSEWYITLPHEDDCCVSETLQITKDEDQPIVGESEPDQIFMRIVIPSSQVSKM     | 584 |
|            |                                                                |     |
| GmZEP1     | ARINYKDGAFPIIDLRSEHGIVITDNECKQVTPPNYPARVRSVDTQFGS-EKRVSRVR     | 649 |
| GmZEP2     | ARINYKDGAFPIIDLRSEHGIVITDNECKRVRTPPNYPARVRSVDTVEFGS-DKASYRVK   | 634 |
| GmZEP3     | -MLVSCDWSILAKQLLTHK-----RPSVIFN-----                           | 564 |
| Gm09g00260 | -----RPSVIFN-----                                              | 564 |
| PA-ZE      | ARISYKDGAFPIIDLRSEHGIVYTDNECKRVRTPPNYPARVRSVDTVEFGS-QVAVSRVR   | 643 |
| AtABA1     | ARVIYKDGAFPIIDLRSEHGIVYTDNECKRVRTPPNYPARVRSVDTVEFGS-DKAAVSRVR  | 644 |
|            |                                                                |     |
| GmZEP1     | VITSSVPRVSENE---STLALQGV                                       | 669 |
| GmZEP2     | VITRSASSESEKE---GTKLYQKV                                       | 654 |
| GmZEP3     | -----                                                          |     |
| Gm09g00260 | -----                                                          |     |
| PA-ZE      | VTKS SPSGVEK-----EGILQAA                                       | 661 |
| AtABA1     | VIRKTPKSTRKNESNNDKLLQTA                                        | 667 |

**E**

|            |                                                                       |     |
|------------|-----------------------------------------------------------------------|-----|
| GmVDE1     | RLELAKCLSNPSCAAHIAQLQTCNHRPDETECQIKCGDLFENSVVDEFNECAVSRKKCVF          | 228 |
| GmVDE2     | RLELAKCLSNPSCAAHIAQLQTCNHRPDETECQIKCGDLFENSVVDEFNECAVSRKKCVF          | 208 |
| Gm03g41420 | RLELAKCLSNPSCAAHIAQLQTCNHRPDETECQIKCGDLFENSVVDEFNECAVSRKKCVF          | 168 |
| CsVDE      | RLELAKCLSNPSCAAHIAQLQTCNHRPDETECQIKCGDLFENSVVDEFNECAVSRKKCVF          | 213 |
| NPQ1       | RLELAKCLSNPSCAAHIAQLQTCNHRPDETECQIKCGDLFENSVVDEFNECAVSRKKCVF          | 187 |
|            |                                                                       |     |
| GmVDE1     | KKSDVGEFFPAPNPDVLVH SFNLADEFS GKWF IIS GLNP TFDTFDCQLHEFHTE-SNKL VGN  | 287 |
| GmVDE2     | KKSDVGEFFPAPNPDVLVH SFNLADEFS GKWF IIS GLNP TFDTFDCQLHEFHTE-SNKL VGN  | 267 |
| Gm03g41420 | KKSDVGEFFPAPNPDVLVH SFNLADEFS GKWF IIS GLNP TFDTFDCQLHEFHTE-SNKL VGN  | 227 |
| CsVDE      | QKSDVGEFFVPPDPA LLVK SFNLADEFS GKWF IIS GLNP TFDTFDCQLHEFHTE-SNKL VGN | 272 |
| NPQ1       | RKSDVGEFFPAPNPDVLVH SFNLADEFS GKWF IIS GLNP TFDTFDCQLHEFHTE-SNKL VGN  | 247 |
|            |                                                                       |     |
| GmVDE1     | LSWRINTPDAGEITRSARQRFVQDPSVPGILYNHDNEYLHYODDWYLLS SKIENKPD D Y V      | 347 |
| GmVDE2     | LSWRINTPDAGEITRSARQRFVQDPSVPGILYNHDNEYLHYODDWYLLS SKIENKSD D Y V      | 327 |
| Gm03g41420 | LSWRINTPDAGEITRSARQRFVQDPSVPGILYNHDNEYLHYODDWYLLS SKIENKPD D Y V      | 287 |
| CsVDE      | LSWRINTPDGGEFTRSARQRFVQDPIHPGILYNHDNEYLHYKDDWYLLS SKIENKPD D Y V      | 332 |
| NPQ1       | LSWRINTLDSGEFTRSARQRFVQDENQPGVLYNHDNEYLHYODDWYLLS SKIENKPE D Y I      | 307 |
|            |                                                                       |     |
| GmVDE1     | FVYYRGRNDAWDGYGGAVIYTRSAVLPESI VPELEKAAKSVGRDFSTFI RTDN TCGPEPS       | 407 |
| GmVDE2     | FVYYRGRNDAWDGYGGAVYTRSAVLPESI VPELEKAAKSVGRDFSKFI RTDN TCGPEPS        | 387 |
| Gm03g41420 | FVYYRGRNDAWDGYGGAVIYTRSAVLPESIVPELEKAAKSVGRDFSTFI RTDN TCGPEPS        | 347 |
| CsVDE      | FVYYRGRNDAWDGYGGAVIYTRSAVLPESI VPELEKAAKSVGRDFSKFI RTDN TCGPEPS       | 392 |
| NPQ1       | FVYYRGRNDAWDGYGGAVYTRSSVLPESI VPELEKAAKSVGRDFSTFI RTDN TCGPEPA        | 367 |
|            |                                                                       |     |
| GmVDE1     | LVERIEKKVEEGEETIIKREVEQLEEEVEK----VGKTEATLFOQLAEGFKVFEDEEENFL         | 463 |
| GmVDE2     | LVERIEKKVEEGEETIIKREVEQLEEEVEK----VGKTEATLFOQLAEGFKMFEDEEENFL         | 443 |
| Gm03g41420 | LVERIEKKVEEGEETIIKREVEQLEEEVEK----VGKTEATLFOQLAEGFKVFEDEEENFL         | 403 |
| CsVDE      | LVERIEKKVEEGEETIIKREVEQLEEEVEK----VGKTEATLFOQLAEGFKELQKDEEENFL        | 448 |
| NPQ1       | LVERIEKIVEEGEETIIKREVEQLEEEVEKVEKVGRTETLFOQLAEGFKELQKDEEENFV          | 427 |
|            |                                                                       |     |
| GmVDE1     | RGLSKEEMELLDGLKMEAGEVEKLFGRALPVRKLR                                   | 498 |
| GmVDE2     | RGLSKEEMELLDGLKMEAGEVEKLFGRALPVRKLR                                   | 478 |
| Gm03g41420 | RGLSKEEMELLDGLKMEAGEVEKLFGRALPVRKLR                                   | 438 |
| CsVDE      | RGLSKEEMDLLSELKMEASEVENLFGRALPVKKLR                                   | 483 |
| NPQ1       | RGLSKEEMELLDGLKMEAGEVEKLFGRALPVRKLR                                   | 462 |

F

|           |                                                                  |     |
|-----------|------------------------------------------------------------------|-----|
| GmNCED1a  | KTIDPRVQLAGNEAPVPEHPVQHSLSLVVIGTIPDRAUNGVYLRNGANPDELPKKCGHLEFDGD | 140 |
| GmNCED 1b | KTIDPRVQLAGNEAPVPEHPVQHSLSLVVIGTIPDRAUNGVYLRNGANPDELPKKCGHLEFDGD | 172 |
| NCED 2    | KTIDPRVQLAGNEAPVPEHPVQHSLSLVVIGTIPDRAUNGVYLRNGANPDELPKKCGHLEFDGD | 168 |
| vp14      | STADPAVQLAGNEAPVGERPPVHSLPVSGRIPPEIDGVTARNGANPDELPKKCGHLEFDGD    | 174 |
| →         |                                                                  |     |
| GmNCED 1a | GMVHGVKENDGPNAS--YACRFETEORLMOERKLGDPVFPKKAICGLHCHSGIARLMLFYARG  | 199 |
| GmNCED 1b | GMVHGVKENDGPNAS--YACRFETEORLMOERKLGDPVFPKKAICGLHCHSGIARLMLFYARG  | 231 |
| NCED 2    | GMVHGVKENDGPNAS--YACRFETEORLMOESQLGDPVFPKKAICGLHCHSGIARLMLFYARG  | 227 |
| vp14      | GMVHGLRDRNGPRAESYACRFETEORLMOERKLGDPVFPKKAICGLHCHSGIARLMLFYARG   | 234 |
| ←         |                                                                  |     |
| GmNCED 1a | LCCIVDHRSCRCGSANAGLVFENGILLAMSEDDLPYELEITPARGDLETICRYSEIDQLNSS   | 259 |
| GmNCED 1b | LCCIVDHRSCRCGSANAGLVFENGILLAMSEDDLPYELEITPARGDLETICRYSEIDQLNSS   | 291 |
| NCED 2    | LCCIVDHRSCRCGSANAGLVFENGILLAMSEDDLPYELEITPARGDLETICRYSEIDQLNSS   | 287 |
| vp14      | ACGLVDPSTACTGVANAGLVFENGILLAMSEDDLPYHVVVDIDGDLLETVGRYDFICQLGCA   | 294 |
| GmNCED 1a | MIADPKVDDPISGELFELSYDVT S-KYLNKYEFE SPDEEKSPDVEIPLDAPMTMDFFAITE  | 318 |
| GmNCED 1b | MIADPKVDDPISGELFELSYDVT S-KYLNKYEFE SPDEEKSPDVEIPLDAPMTMDFFAITE  | 350 |
| NCED 2    | MIADPKVDDPISGELFELSYDVT S-PCVNYENE SPK-EVKSPEVEIPLDAPMTMDFFAITE  | 346 |
| vp14      | MIADPKVDDPATGELFELSYDVTIRPYLNKYEFE RPD-GAKSDDVEIPLDAPMTMDFFAITE  | 353 |
| GmNCED 1a | NFVWIPDQVVVFKLGEMVCGGSPVVIYDCEKNSREGVLPKRYASDASSIWWVDSPIETEREFE  | 378 |
| GmNCED 1b | NFVWIPDQVVVFKLGEMVCGGSPVVIYDCEKNSREGVLPKRYASDASSIWWVDSPIETEREFE  | 410 |
| NCED 2    | NFVWIPDQVVVFKLGEMVCGGSPVVIYDCEKNSREGVLPKRYASDASSIWWVDSPIETEREFE  | 406 |
| vp14      | NFVWVDPDQVVVFKLGEMVCGGSPVVIYDCEKNSREGVLPKRYASDASSIWWVDSPIETEREFE | 413 |
| GmNCED 1a | INRWEEEDTDEVVVIGSCMTPPDSIFKITEESIKSVLTEIRLNRSEKSRRRVUVE---E      | 435 |
| GmNCED 1b | INRWEEEDTDEVVVIGSCMTPPDSIFNDRERIKSVLTEIRLNRSEKSRRRVUVE---E       | 467 |
| NCED 2    | ENRWEEEDTDEVVVIGSCMTPPDSIFNDRSENLITLITEIRLNRSEKSRRRVUVE---N      | 463 |
| vp14      | INRWEEEDTGEVVVIGSCMTPPDSIFNESDERIBSVLTEIRLNRSEKSRRRVUVE---SQQ    | 473 |
| GmNCED 1a | INLEAGMVRNRKRLGRNTRERYLQVAEPWPKVSGVAKVILSCEVKKRMEYGERREGGEPFE    | 495 |
| GmNCED 1b | INLEAGMVRNRKRLGRNTRERYLQVAEPWPKVSGVAKVILSCEVKKRMEYGERREGGEPFE    | 527 |
| NCED 2    | INLEAGMVRNRKRLGRNTRERYLQVAEPWPKVSGVAKVILSCEVKKRMEYGERREGGEPFE    | 523 |
| vp14      | INLEAGMVRNRNLLGRETTRERYLQVAEPWPKVSGVAKVILSCEVKKRMEYGERREGGEPFE   | 533 |

**G**

|            |                                                                  |     |
|------------|------------------------------------------------------------------|-----|
| GmCCD7a    | -----YQAPPIHNT---BTYIPPPIRSP-PVHQTPPSIPSTIKPRAI                  | 38  |
| GmCCD7b    | -----YQAPPIHNT---BTYIPPPIRSP-PVHQTPPSIPSTIKPRAV                  | 38  |
| Gm01g35910 | -----MVPMP-----ILVTTTPPPATSAPSPILLNAVSTLKEEKPTQ                  | 37  |
| SlCCD7     | MDLQFVSLPPNSKTKAKMOAACHNINNIPEKLLPPAKLSTVAMSPSQTLPQSHVARRAI      | 60  |
| AtCCD7     | -----VSLP-----IPEKFTPEPKLSPPIHQQTPPELAPERRAAITSI                 | 36  |
|            |                                                                  |     |
| GmCCD7a    | SISAPNIPPIAVPIPIPIVEPDDSNAAAYDYQELFISORSEATRPVTEI STVEGATPDAFPSC | 98  |
| GmCCD7b    | SISAPNTPVAVPIPIPIVEPDDSNAAAYDYQELFISORSETSPQVTEI STVEGVTPDAFPSC  | 98  |
| Gm01g35910 | TLKTPTTTTQKATIKPSPSSSTKTKTPQQRVELKRTNSWVPALMNAFDDIINNFIDPP       | 97  |
| SlCCD7     | TTTTSPTEHEVYTP---EIDDTVFAAYDYQELFVTSORSEATEPVSIRVVEGSIPTDFPSC    | 116 |
| AtCCD7     | SDPTTGLGRFTIID---ESTSSAFRDYQSLVTSORSETIEPVIKPIEGSIIVNFPSC        | 92  |
|            |                                                                  |     |
| GmCCD7a    | IIYLLTGPGLIADHGGSTVHPLDGHGYLRAFTEDNNTVTKNVKYMAYKYIKTDAHVEEHDPKT  | 158 |
| GmCCD7b    | IIYLLTGPGLIADHGGSTVHPLDGHGYLRAFTEDN-ATKNVKYMKYIKTDAHVEEHDPKT     | 157 |
| Gm01g35910 | LKPSIDPRHVLSONFADVHSLPPT---ECEVEGSLPP---SLDGAYTRNGPNPQ-----      | 146 |
| SlCCD7     | IIYLLTGPGLIADHGGSTVHPLDGHGYLRAFTEDNSTGQ-VKFMARYIETEAQTEERDPVS    | 175 |
| AtCCD7     | IIYLLAGPGLITDDHGGSTVHPLDGHGYLRAFTEDNKRK-ATFTAKYIKTEAKKEEHDPT     | 151 |
|            |                                                                  |     |
| GmCCD7a    | NKWFTHRGPFSVLKGGKVGNTKVMKNVANTSVLKWGEKLLCWEGGEPYEIQAGHIDT        | 218 |
| GmCCD7b    | DKWFTHRGPFSVLKGGKVGNTKVMKNVANTSVLKWGEKLLCWEGGEPYEIQAGHIDT        | 217 |
| Gm01g35910 | ----FLRGRVYHLEDCDGLHALRISHGKKPLCSRYVVKYKYMENADGFPILPNVFSG        | 202 |
| SlCCD7     | GKWFTHRGPFSVLKGGKVGNTKVMKNVANTSVLQWCELEFCWEGGDDPEIDSKHMT         | 235 |
| AtCCD7     | DIWRFTHRGPFSVLKGGKRGNTKVMKNVANTSVLKWAGRILLCWEGGEPYETESGSLDT      | 211 |
|            |                                                                  |     |
| GmCCD7a    | IGRNMMD-GADMENHDQSKGG---GGGVVVEVAANLLKPILYGVFKMPPRRLLSHYKVDS     | 275 |
| GmCCD7b    | IGRNMMD-GADLENHDESKDG---VDVVEVAANLLKPILYGVFKMPPRRLLSHYKVDS       | 272 |
| Gm01g35910 | LNSLVAASAARGSLAARFLTG-----QFNPAANGIGLANTSLAFGNRDFALGESD-         | 252 |
| SlCCD7     | LGLKLELKH-NSDQVLEDKKIS---HSDLELVAAQLLKPILYGVFKMSPRRLLSHYKIDT     | 290 |
| AtCCD7     | VGRNVENNNGCESDDESDDRDLSGHDIDTADAILLKPILQGVFKMPPRRLLSHYKVDG       | 271 |
|            |                                                                  |     |
| GmCCD7a    | RRNRLLTVSNCAEDMLLPRSNFTFSEYDSNENVVQKQVFRIPDHLMIHDWAFDTTHYIVF     | 335 |
| GmCCD7b    | RRNRLLTVSNCAEDMLLPRSNFTFSEYDSNENVVQKQVFRIPDHLMIHDWAFDTTHYIVF     | 332 |
| Gm01g35910 | -LPYVNVTPDGDIEDLGR---HDEEGKLTFSMTAHPKIDP-DTAECAFRYGPPVPPF        | 305 |
| SlCCD7     | RRNRLLTVSNCAEDMLLPRSNFTFSEYDSNENVVQKQVFRIPDHLMIHDWAFDTTHYIVF     | 350 |
| AtCCD7     | RRNRLLTVSNCAEDMLLPRSNFTFSEYDSNENVVQKQVFRIPDHLMIHDWAFDTTHYIVF     | 331 |
|            |                                                                  |     |
| GmCCD7a    | ANRIKLDVLSMAAVYGMSPMVSALRVNPSKSTSPIYLLPRFPDKNN-----GKERDWR       | 389 |
| GmCCD7b    | ANRIKLDVLSMAAVYGMSPMVSALRVNPSKSTSPIYLLPRFPDKNN-----DKERDWR       | 387 |
| Gm01g35910 | LTIFYRFVGGKKHEDVPIFSMLTSPFTHDFAIKKYALFCDIQGLN-----PLDMI          | 357 |
| SlCCD7     | GNRIKLDIPGSMFAVCGHSPMVSALSHPNSKSTSPIYLLPRFRNN-----NVERDWR        | 402 |
| AtCCD7     | ANRVKLPITGSLAAMCGMSPMVSALSHPNSKSTSPIYLLPRFSDKYS-----RGERDWR      | 385 |
|            |                                                                  |     |
| GmCCD7a    | VPVEAPSQLMILLHVGNAFEVR-HPHGHLDIKIQAAACSYQWFNFSKIFGYDWQSKKLDPS    | 448 |
| GmCCD7b    | VPVEAPSQLMILLHVGNAFEVR-YPHRHLDIKIQAAACSYQWFNFSKIFGYDWQSKKLDPS    | 446 |
| Gm01g35910 | SGGSPVGSVASKVPRIGILPRDAKDESMKWFEPGFEN---IHALNAWEDEGRIVVL         | 413 |
| SlCCD7     | KPVEAPSQLMILLHVGNAFEVIDEQGHLLNIOIQASCSYQWFNFKIFGYDWQSKKLDPS      | 462 |
| AtCCD7     | VPVEVSSQLMILLHVGNAFEVR-EDHGHLKIQIQASCSYQWFNFKIFGYDWQSKKLDPS      | 444 |
|            |                                                                  |     |
| GmCCD7a    | IMNVKGG-SKLLPHLVQVSTKLDSDYNCQECDDVKKPK-KKKKSDFPATNPTSGKKNKY      | 506 |
| GmCCD7b    | IMNVKGG-NELLPHLVQVSTKLDSDYNCQECDDVKKPK-KKKKSDFPATNPTSGKKNKY      | 504 |
| Gm01g35910 | VAPNILSMEHATERMELVHAMVEKVRIELDGTITRQPVVSARMDFAVINPAVGGKKNRF      | 473 |
| SlCCD7     | MMNVEEGEEKLLPHLVQVSTKLDKSGNCTKCSVNDLMPENKARDPFAVMEPESGKKNRY      | 522 |
| AtCCD7     | VMNENRGDDKLLPHLVQVSTKLDSTGNCNQCDDVKKPK-GWKKPSDFPATNPTSGKKNKY     | 503 |
|            |                                                                  |     |
| GmCCD7a    | IYAATTLGSRKTLPCFPFDIVVKIDLETESVAQIWTAGSRRFTGEPVFEKGY----Q        | 561 |
| GmCCD7b    | IYAATTLGSRKTLPCFPFDIVVKIDLES-DNSAQIWTAGSRRFTGEPVFEKGD----E       | 558 |
| Gm01g35910 | VYAAVGDPMPKISGVVKLDVSKGEE--RRDCTVGRMYEGCCYGEPPFVAREEGG---E       | 528 |
| SlCCD7     | IYAATCTGSRQALPHFPFDIVVKIN--AVDKSVQKWSAGRRFTGEPVFEKGTN----K       | 576 |
| AtCCD7     | MYSAASSGRSELPHFPFDIVVKID--LDSNLQRTVSTGARRFTGEPVFEKHSVEEGEE       | 561 |
|            |                                                                  |     |
| GmCCD7a    | EDDGYLLVVEYAVSMNRCYLVTLLDPKRIADNALTARTEIE--SHLNFPLGFHGFVA-N      | 618 |
| GmCCD7b    | EDDGYLLVVEYAVSMNRCYLVTLLDPKRIADNALTARTEIE--SHLNFPLGFHGFVA-N      | 615 |
| Gm01g35910 | EDDGYLLVSYVHDERKGESRFLVMDAK--SPELDVVAAVRLPR-----RVPYGFHGLFVKE    | 581 |
| SlCCD7     | EDDGYLLVVEYAVSITRCYLVTLLDAQTIGEKNEVVARLEVE--RHLNFPLGFHGFVWPTN    | 634 |
| AtCCD7     | EDDGYIVVVEYAVSVERCYLVTLLAKIGESDAVVSVMKVIYIAKINYLICVHSFYEDRN      | 621 |
|            |                                                                  |     |
| GmCCD7a    | -----                                                            |     |
| GmCCD7b    | -----                                                            |     |
| Gm01g35910 | SELRKVSL-----                                                    | 590 |
| SlCCD7     | SSLANLQKIESKCKNSWSMMKDNMVKLGQ                                    | 663 |
| AtCCD7     | IAFHLSHK-----                                                    | 629 |

**H**

|            |                                                                                                                           |     |
|------------|---------------------------------------------------------------------------------------------------------------------------|-----|
| GmCCD8a    | --MLVPD---PHINISLRNKG-IYKGR-----NINLRDLTKAVASPSLPVLPPTTE                                                                  | 49  |
| GmCCD8b    | --MLVPD---PHNNISLRNKGFIYKQH-----GINLRDFTKAVASPSLPVLPPTTE                                                                  | 50  |
| Gm08g10190 | LNSSTCAKQPFPHPLSSSFSSSSSLTRDLGFPTRFQKKPIRKVVDCALHSPVVIHFPPNQF                                                             | 65  |
| PhCCD8     | MASFAS---RKYCNKILPERFDHGRKDEPHFGKIKINEKTKKMDLKLVTNVSQLTV                                                                  | 57  |
| AtCCD8     | MASLIITKAMSHHHVLSSTRITLYSDNSIGDQQIKTKPQVPHRLFARRIFGVRAVIN                                                                 | 60  |
| →          |                                                                                                                           |     |
| GmCCD8a    | ERP---GITHD--CHHHIVAWTSIPQERWEGELVQGGIPLWLEGGTYLRNGPQGMWHIG                                                               | 102 |
| GmCCD8b    | ERK---ETTADDRHHHHIVAWTSIPQERWEGELVQGGIPLWLEGGTYLRNGPQGMWHIE                                                               | 106 |
| Gm08g10190 | YKNPLNQFPFKTTDPVQVIAGNFAPVPEHPVHSLPVIQTTPDAINGVYLRNGANPLFKP                                                               | 125 |
| PhCCD8     | I VS---PLDQEVVKEKLLAAWTSVQERWEGELVVEGEP L W L S G T Y L R N G P G L W H V G                                               | 113 |
| AtCCD8     | SAAPSPLPEKEKVEGERRCHVAVTSVQERWEGELVQGGIPLWLEGGTYLRNGPGLWHIG                                                               | 120 |
| ←          |                                                                                                                           |     |
| GmCCD8a    | DYNFRHLFDGYATLVRLGFRNGRLVAGHROIESEAYRAAKKMKKLCYREFSEVPK----A                                                              | 158 |
| GmCCD8b    | DYNFRHLFDGYATLVRLGFRNGRLVAGHROIESEAYRAAKKMKKLCYREFSEVPK----A                                                              | 162 |
| Gm08g10190 | KAGH-HLFDGDMVHAVKENDG-TASYACRFTEQRLMQERKLGKPVFPKAIQELHGHSG                                                                | 183 |
| PhCCD8     | DYNFRHLFDGYATLVRLGFRNGRLVAGHROIESEAYRAAKKMKKLCYREFSEVPK----P                                                              | 169 |
| AtCCD8     | DHDFRHLFDGYSTLVKLVQEDGGRLFAAHLLESDAYRAAKKMKKLCYREFSEVPKSVIIN                                                              | 180 |
| GmCCD8a    | ANFLAVVGGELASLFSGASLTDNANTGVVVKLGDGRVVCLETETQKGSIVINPETLLETIGKFE                                                          | 218 |
| GmCCD8b    | ANFLAVVGGELASLFSGASLTDNANTGVVVKLGDGRVVCLETETQKGSIVINPETLLETIGKFE                                                          | 222 |
| Gm08g10190 | --IARIMLFYARGLCGIVDHRRGAGAANAGLVFENGKLLAMS EDDFPYELRITASGDLETI                                                            | 242 |
| PhCCD8     | ENFLSIVTDMKALFSGASLTDNANTGVVVKLGDGRVVCLETETQKGSIVINPETLLETIGKFE                                                           | 229 |
| AtCCD8     | KNPFSIVTEIVRLFSGASLTDNANTGVVVKLGDGRVVCLETETQKGSIVVDHETLLETIGKFE                                                           | 240 |
| GmCCD8a    | YSDSLGG-LIHSAPHIVTDEEFTLLLPDLVRAGYLVVRMEPGTNERRVIGRVNCRGGP-A                                                              | 277 |
| GmCCD8b    | YSDSLGG-LIHSAPHIVTDEEFTLLLPDLVRAGYLVVRMEPGTNERRVIGRVNCRGGP-A                                                              | 280 |
| Gm08g10190 | GRYSFHGQLNSMKVDPVSGELFTLSYDVTSKLLKYFHFSPEDERKSPDIEIPLDAPT--                                                               | 300 |
| PhCCD8     | YSDSLGG-LIHSAPHIVTDEEFTLLLPDLVRAGYLVVRMEPGTNERRVIGRVNCRGGP-A                                                              | 287 |
| AtCCD8     | YDDVLSDDHMTQSAPHIVTDEEFTLLLPDLVRAGYLVVRMEPGTNERRVIGRVNCRGGP-A                                                             | 300 |
| GmCCD8a    | PGWVHSFPPVTOHYVIVPEMPLRYCAQNLLKAEP TPLYKFEWHPESRAF MHVMCKTSGKIV                                                           | 337 |
| GmCCD8b    | PGWVHSFPPVTOHYVIVPEMPLRYCAQNLLKAEP TPLYKFEWHPESRAF MHVMCKTSGKIV                                                           | 340 |
| Gm08g10190 | --MTHDFAITENFVVIPDQVVFVVLKLGEMIKGSSPVIIDGEEKSRFGILPKYASDAS-SI-                                                            | 357 |
| PhCCD8     | P G W V H S F P P V T O H Y V I V P E M P L R Y C A Q N L L K A E P T P L Y K F E W H P E S R A F M H V M C K T S G K I V | 347 |
| AtCCD8     | P G W V H S F A V T E N Y V V I P E M P L R Y S V K N L L R A E P T P L Y K F E W C P Q D G A F I H V M S K T G E V V     | 360 |
| GmCCD8a    | ASVEVPDFVTFHFINAYEE-QDE DGRVTAIADCCENSDTILDKRLRLQLNRSNGEDV                                                                | 396 |
| GmCCD8b    | ASVEVPDFVTFHFINAYEE-QDE DGRVTAIADCCENSDTILDKRLRLQLNRSNGEDV                                                                | 399 |
| Gm08g10190 | VWVDSIDTEFDFHFNAWE---RDKDEVVVISSCMTPE-----PDSIFNDREE                                                                      | 401 |
| PhCCD8     | ASVEVPDFVTFHFINAYEE-KDE DGRVTAIADCCENSDTILDKRLRLQLNRSNGEDV                                                                | 406 |
| AtCCD8     | ASVEVPDFVTFHFINAYEEDKNGDGKATVIADCCENADTILDKRLRLQLNRSNGEDV                                                                 | 420 |
| GmCCD8a    | LPDARVGRFRIPLDGSPYGLDAALEPNEHGRMDMCSINPNYLGGKYRYAYACGAORPC                                                                | 456 |
| GmCCD8b    | LPDARVGRFRIPLDGSPYGLDAALEPNEHGRMDMCSINPNYLGGKYRYAYACGAORPC                                                                | 459 |
| Gm08g10190 | RLKSVLTVLNMRSKGARRRVLVEEMN----LEAGMVNRKRIGRKRFRAYLC-IAEPW                                                                 | 453 |
| PhCCD8     | LPDARVGRFRIPFDGSPYGLDAALDPNEHGRMDMCSINPNYLGGKYRYAYACGAORPC                                                                | 466 |
| AtCCD8     | LPDARVGRFRIPLDGSKYGLLETAVEAEKHGRMDMCSINPNYLGGKYRYAYACGAORPC                                                               | 480 |
| GmCCD8a    | NFPNILLTKIDFELKAKNWHEEGAVPSEPPFFVARPGATEDDGVVISIVSEKNGEGYFALV                                                             | 516 |
| GmCCD8b    | NFPNILLTKIDFELKAKNWHEEGAVPSEPPFFVARPGATEDDGVVISIVSEKNGEGYFALL                                                             | 519 |
| Gm08g10190 | PKVSGVAKVDLESGEVVKREYGRRRFGGEPFFLPRGNGNEDEGYVMAFVHDETWSLQI                                                                | 513 |
| PhCCD8     | NFPNILLTKIDLFEKAKNWHEEGAVPSEPPFFVARPGATEDDGVVISISDKNGEGYFALI                                                              | 526 |
| AtCCD8     | NFPNALLSKVDLVEKVKNWHEHGMIPSEPPFFVARPGATEDDGVVISIVSEKNGEGYFALL                                                             | 540 |
| GmCCD8a    | LDGSTFEEIARAKFPYGLPYGLHGCWVPKE                                                                                            | 546 |
| GmCCD8b    | LDGSTFEEIARAKFPYGLPYGLHGCWVPKE                                                                                            | 549 |
| Gm08g10190 | LNALD--LKEAIVMLPSRVPYGFHGTVE                                                                                              | 541 |
| PhCCD8     | LDGSTFEEIARAKFPYGLPYGLHGCWVPKK                                                                                            | 556 |
| AtCCD8     | LDGSTFEEIARAKFPYGLPYGLHGCWVPKD                                                                                            | 570 |

I

|         |                                                                     |     |
|---------|---------------------------------------------------------------------|-----|
| GmCCD1a | MGD DGGKMSGEGGIVKVEPKPSNGFTSKVVDLLEKLVVKELMDSSLTHHYLTGTFAPVP-       | 59  |
| GmCCD1b | MGD DGGKLSGEGGIVKVEPKPSNGFTSKVVDLLEKLVVKELMDSSLPHHYLTGTFAPVS-       | 59  |
| MtCCD1  | --MESEKIG--GGIVKVEPKPSNGFTSKVVDLLEKLVVKELMDSSLPHHYLTGTFAPVKD        | 56  |
| RtCCD1  | ---MREKLSDGSSIISVHPRPKSGFSSKLDLLERLVVKELMDSSLPHHYLTGTFAPVTRD        | 57  |
|         |                                                                     |     |
| GmCCD1a | ETPPDKDLPVKGYLPDCLNGEFVVRVGNPKKESPVAGYHCSGICFSNFDLLNCRMTHGLRI       | 119 |
| GmCCD1b | ETPPDKDLPVKGYLPDCLNGEFVVRVGNPKKESPVAGYH-----FDGD--GMIHGLRI          | 110 |
| MtCCD1  | ETPPDKDLPIKGYLPDCLNGEFVVRVGNPKKESPVAGYH-----FDGD--GMIHGLRI          | 107 |
| RtCCD1  | ETPPDKDLPVHGYLPDCLNGEFVVRVGNPKKESPVAGYH-----FDGD--GMIHGVRI          | 108 |
|         |                                                                     |     |
| GmCCD1a | KDGKATVSRVYKTSRLKQEEYFGGSKFMKIGDKGLFGLLMVNIHMLRTKQKVLDAVSYG         | 179 |
| GmCCD1b | KDGKATVSRVYKTSRLKQEEYFGGSKFMKIGDKGLFGLLMVNIHMLRTKQKVLDAVSYG         | 170 |
| MtCCD1  | KDGKATVSRVYKTSRLKQEEYFGGSKFMKIGDKGLFGLLMVNIHMLRAKQKVLDAVSYG         | 167 |
| RtCCD1  | KDGKATVSRVYKTSRLKQEEYFGGAKFMKIGDKGLFGLLMVNIHMLRTKQKVLDAVSYG         | 168 |
|         |                                                                     |     |
| GmCCD1a | TGTANTALVYHHGKLLALSERDKPYRIKIMTR-DWATPSLLIQ-----                    | 221 |
| GmCCD1b | TGTANTALVYHHGKLLALSERDKPYRIKVEEDGDLQTLGMLDYDKRLEGHSFTAMPKVDFP       | 230 |
| MtCCD1  | HGTANTALVYHHGKLLALSERDKPYRIKVEEDGDLQTLGMLDYDKRLEGINFTAMPKVDFP       | 227 |
| RtCCD1  | NGTANTALVYHHGKLLALSERDKPYRIKVEEDGDLQTLGMLDYDKRLEHSFTAMPKVDFP        | 228 |
|         |                                                                     |     |
| GmCCD1a | KGDVY-----FYRVISKDGKGMDDPVPITVSDPIMHDFAITERYRIFLDLPLIF              | 270 |
| GmCCD1b | TGEMFTFGYRHTPPYITFYRVISKDGKGMDDPVPITVSDPIMHDFAITERYRIFLDLPLIF       | 290 |
| MtCCD1  | TGEMFTFGYSHTPPYITFYRVISKDGKGMDDPVPITVSDPIMHDFAITERYRIFLDLPLIF       | 287 |
| RtCCD1  | TGEMFTFGYSHTPPYITFYRVISKDGKGMDDPVPITVSDPIMHDFAITERYRIFLDLPLIF       | 288 |
|         |                                                                     |     |
| GmCCD1a | RPKEMVKKIKTLIESFDS TKKARF GVLPRY AKDEKLRWFE LPNCF IEHNANAWEE EDEVV  | 330 |
| GmCCD1b | RPKEMVKKIKTLIESFDS TKKARF GVLPRY AKDEKLRWFE LPNCF IEHNANAWEE EDEVV  | 350 |
| MtCCD1  | RPKEMVKKIKTLIESFDS TKKARF GVLPRY AKDEKLRWFE LPNCF IEHNANAWEE EDEVV  | 347 |
| RtCCD1  | RPKEMVKEKIKTLIESFDS TKKARF GVLPRY AKDELIRWFE LPNCF IEHNANAWEE EDEVV | 348 |
|         |                                                                     |     |
| GmCCD1a | LI TCRL INPNLD VGGTAKKLENF S NEL YEMRFNMKTGEASQKLSASAVDFPRVNESY     | 390 |
| GmCCD1b | LI TCRL INPNLD VGGTAKKLENF S NEL YEMRFNMKTGEASQKLSASAVDFPRVNESY     | 410 |
| MtCCD1  | LI TCRL INPNLD VGGTAKKLENF S NEL YEMRFNMKTGEASQKLSASAVDFPRVNESY     | 407 |
| RtCCD1  | LI TCRL INPDLVSGVAKKLENF S NEL YEMRFNMKTGEASQKLSASAVDFPRVNECY       | 408 |
|         |                                                                     |     |
| GmCCD1a | TGRKORYVYGTLDSTAKV TGI IKFDLHAE PDHGKT KLEV GGNVVG YDLGPGRYGSEAV    | 450 |
| GmCCD1b | TGRKORYVYGTLDSTAKV TGI IKFDLHAE PDHGKT KLEV GGNVVG YDLGPGRYGSEAV    | 470 |
| MtCCD1  | TGRKORYVYGTLDSTAKV TGI IKFDLHAE PDHGKT KLEV GGNVVG YDLGPGRYGSEAV    | 467 |
| RtCCD1  | TGRKORYVYGTLDSTAKV TGI IKFDLHAE PDHGKT KLEV GGNVVG YDLGPGRYGSEAV    | 468 |
|         |                                                                     |     |
| GmCCD1a | YVPRVP GTD SEEDDGYL ICFVHDENTGKS FVHVINAKTMS RD PVAVVEL PHRVPYGFHAF | 510 |
| GmCCD1b | YVPRVP GTD SEEDDGYL ICFVHDENTGKS FVHVINAKTMS RD PVAVVEL PHRVPYGFHAF | 530 |
| MtCCD1  | YVPRVP GTD SEEDDGYL ICFVHDENTGKS FVHVINAKTMS RD PVAVVEL PHRVPYGFHAF | 527 |
| RtCCD1  | YVPRET ---REEDDGYL ICFVHDENTGKS CVTVIDAKTMS REPVAVVEL PHRVPYGFHAF   | 525 |
|         |                                                                     |     |
| GmCCD1a | FVTE EQLQE-----TGKL-----                                            | 523 |
| GmCCD1b | FVTE VCVTTTFIYSYIAFL PLELSSITLAKLQCLFSNHFLRVIV                      | 574 |
| MtCCD1  | FVTE EQLQE-----QAKL-----                                            | 540 |
| RtCCD1  | FVTE EQLQE-----QLLI-----                                            | 538 |



**Supplemental Figure S1. Comparison of the amino acid sequences of  $\beta$ -carotene hydroxylases, zeaxanthin epoxidases (ZEPs), violaxanthin de-epoxidases (VDEs), 9-cis-epoxycarotenoid dioxygenase 1s (NCED1s), carotenoid cleavage dioxygenases 7s, carotenoid cleavage dioxygenases 8s, and carotenoid cleavage dioxygenases 1s.**

(A) Sequence alignment of  $\beta$ -carotene hydroxylases. The conserved histidine motifs are indicated above the sequence. Identical amino acid residues are shaded black and conserved amino acid residues, gray. Dashes indicate gaps introduced to optimize alignment. . The ORFs of GmBCH4 and GmBCH5 have a high degree of similarity to functionally confirmed  $\beta$ -carotene hydroxylases, e. g., 79 % and 73 % to CaCRTR-B from *Capsicum annuum* (Simkin et al., 2008), respectively. A solid line above amino acid sequence indicates the region of *GmBCH(1+3)* probe for *in situ* hybridization (Fig. 3, D to E) and a double line above amino acid sequence indicates the region of *GmBCH2* probe for *in situ* hybridization (Fig. 3, I to M). GenBank accession numbers: *Glycine max GmBCH1* (AY575953); *Glycine max GmBCH2* (BT093388); *Glycine max GmBCH3* (BT098487); *Glycine max GmBCH4* (JF970190); *Glycine max GmBCH5* (JF970191); *Coffea arabica CaCRTR-B* (ABA43903); *Arabidopsis thaliana AtCHY1* (NP\_194300).

Expression of *GmBCH4* (B) and *GmBCH5* (C), respectively, in soybean tissues including 27-day-old nodules. Transcript levels were determined by real time RT-PCR and normalized. Data are representative of three independent experiments. Bars represent standard deviations (n=3). L, leaf; S, stem; F, flower; R, root; N, Nodule. GenBank accession numbers: *Glycine max GmBCH4* (JF970190); *Glycine max GmBCH5* (JF970191).

(D) Amino acid sequence alignment of zeaxanthin epoxidases (ZEPs). Identical amino acid residues are shaded black and conserved amino acid residues are shaded gray. Dashes indicate gaps for optimizing alignment. Primers used in real-time PCR are indicated by arrows. GenBank accession numbers: *Glycine max GmZEP1* (HM366149);



*Glycine max GmZEP2* (HQ875555); *Glycine max GmZEP3* (HQ875556); *Prunus armeniaca PA-ZE* (AAD42899); *Arabidopsis thaliana AtABA1* (NP\_851285).

(E) Amino acid sequence alignment of violaxanthin de-epoxidases (VDEs). Partial amino acid sequences of VDEs are aligned. Identical amino acid residues are shaded black and conserved amino acid residues are shaded gray. Dashes indicate gaps for optimizing alignment. Primers used in real-time PCR are indicated by arrows. GenBank accession numbers: *Glycine max GmVDE1* (HQ875559); *Glycine max GmVDE2* (HQ875560); *Citrus sinensis CsVDE* (ADH82116); *Arabidopsis thaliana NPQ1* (NP\_172331).

(F) Amino acid sequence alignment of 9-cis-epoxycarotenoid dioxygenase 1s (NCED1s). Partial amino acid sequences of NCED1s are aligned. Identical amino acid residues are shaded black and conserved amino acid residues are shaded gray. Dashes indicate gaps for optimizing alignment. Primers used in real-time PCR are indicated by arrows. GenBank accession numbers: *Glycine max GmNCED1a* (HQ875557); *Glycine max GmNCED1b* (HQ875558); *Phaseolus vulgaris NCED2* (AAY82457); *Zea mays viviparous14 (vp14)* (NP\_001105902).

(G) Amino acid sequence alignment of carotenoid cleavage dioxygenases 7s. Identical amino acid residues are shaded black and conserved amino acid residues are shaded gray. Dashes indicate gaps for optimizing alignment. Primers used in real-time PCR are indicated by arrows. GenBank accession numbers: *Glycine max GmCCD7a* (HM366150); *Glycine max GmCCD7b* (JF894312); *Solanum lycopersicum SICCD7* (ACY39882); *Petunia x hybrida RhCCD7* (ACY01408); *Arabidopsis thaliana AtCCD7* (NP\_182026).

(H) Amino acid sequence alignment of carotenoid cleavage dioxygenases 8s. Identical amino acid residues are shaded black and conserved amino acid residues are shaded gray. Dashes indicate gaps for optimizing alignment. Primers used in real-time PCR are indicated by arrows. GenBank accession numbers: *Glycine max GmCCD8a*

(HM366151); *Glycine max GmCCD8b* (JF894313); *Petunia x hybrida PhCCD8* (AAW33596); *Zea mays ZmCCD8* (ACR33785); *Arabidopsis thaliana AtCCD8* (NP\_195007).

(I) Amino acid sequence alignment of carotenoid cleavage dioxygenases 1s. Identical amino acid residues are shaded black and conserved amino acid residues are shaded gray. Dashes indicate gaps for optimizing alignment. Primers used in real-time PCR are indicated by arrows. GenBank accession numbers: *Glycine max GmCCD1a* (FK009136); *Glycine max GmCCD1b* (JF894311); *Medicago truncatula MtCCD1* (CAR57918); *Arabidopsis thaliana AtCCD1* (NP\_191911); *Coffea arabica CaCCD1* (ABA43904).

## Supplemental Figure S2

**A**

```

GAGTTTAGGT CCAGCGTCCG TGGGGGGGGT ACGACGAGAA ATTCTCTCGA GGTCAACAAGT -373
GTTTCATCTTC GTTGTTTCTC TTCGTAACAA AAGATGAAGA GCTTACACCG CAATTAGCCC -313
CACCATGTTT ACCGTCACCA ACACATGAT TACTTCCTGA ACCTCCTCCG GCACAGCTCA -253
GTTTACACGC CCTGTCTGGC CATTGAGCAC CTGAAACTTT ACCCGTGCAA GGGTTCATTG -193
GTGATTTTTTC GGTAAGCATT TTAGTAGATG GAGGCAGCAC ATATAATTTT CTGCACCACC -133
GTGTTGTGAT GGCCTTAGGT ATTTCAACAA CGGAGACTGC ACCACTTCGA GTAACGGTAG -73
GCAACAGGGA CGAGATTCGT TGCCATCAGC TGTGTAACGC TGTACACGTC CAAATACAAG -13
GGCATTTCGCT TCATGGGGGA TAGAATCGAA TTCCCGCGGC CGCCATGGCG GCCGGGAGCA +48
    
```

**B**

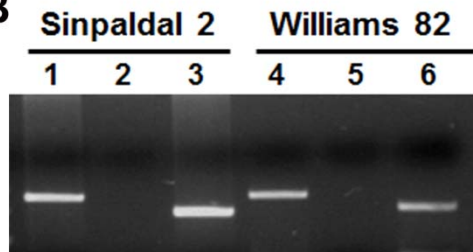

**Supplemental Figure S2. The upstream region of *GmBCH1* isolated by DNA walking.**

The 5' region of *GmBCH1* was isolated by using a DNA Walking SpeedUP<sup>TM</sup> Premix Kit (SEEGENE) according to manufacturer's recommendation. The underlined is the position of primer used in the DNA Walking and the start codon is indicated by shaded gray. (B) Genomic PCR analysis of *GmBCH1*. Genomic DNAs of the cultivar Sinpaldal 2 (lanes 1 to 3) and the cultivar Williams 82 (lanes 4 to 6) were used, respectively. Genomic PCR of *GmBCH3* was loaded in lanes 1 and 4 as control and primers used are the same indicated in Supplemental Fig. S4. Lanes 2 and 5 show genomic PCR product with *GmBCH1* forward primer (shown in red color) and *GmBCH3*-specific reverse primer, which serve as negative control. Lanes 3 and 6 indicate the existence of upstream region of *GmBCH1*. Primers used in genomic PCR of *GmBCH1* are indicated in red (forward primer) and orange (reverse primer) color in panel A.

## Supplemental Figure S3

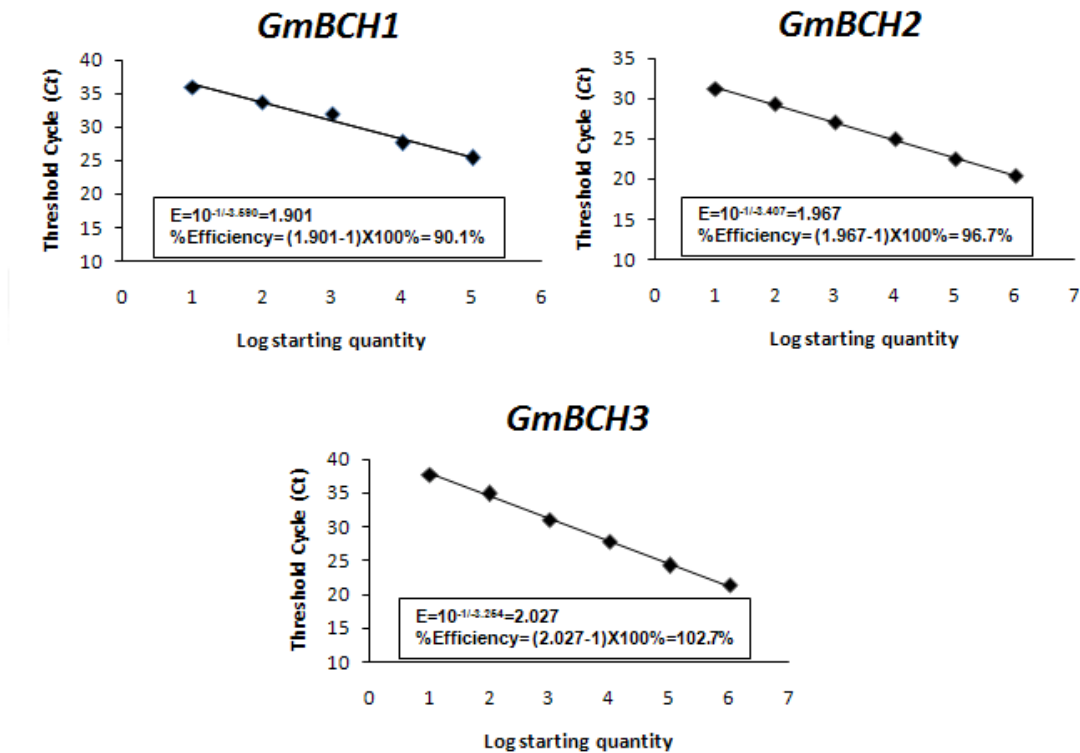

**Supplemental Figure S3. Assessment of PCR efficiency of primer sets for *GmBCHs*.**

The efficiency of the primer sets used for *GmBCHs* was tested by plotting the threshold cycle (*Ct*) at each concentration of the samples. The slope of a linear-regression trendline indicates the primer efficiency. PCR efficiency of primers was calculated as  $[10(-1/S)-1] \times 100\%$ , where *S* is the slope of the regression line [Hu R, Fan C, Li H, Zhang Q, Fu Y-F (2009) Evaluation of putative reference genes for gene expression normalization in soybean by quantitative realtime RT-PCR. *BMC Mol Biol* 10: 93].



**Suppelemental Figure S4. Assessment of probes for *in situ* hybridization.**

(A and B) Sequence alignment of *GmBCH(1+3)* probe with *GmBCH2* genomic DNA (A) and *GmBCH2* probe with *GmBCH(1+3)* genomic DNA (B). (C) Whole-mount *in situ* hybridization of soybean leaves with *GmBCH(1+3)* sense probe, *GmBCH2* sense probe, *GmBCH(1+3)* antisense probe, and *GmBCH2* antisense probe. (D) The intensity of the images in panel C for *GmBCH(1+3)* and *GmBCH2* expression was measured using Image J (National Institutes of Health, Bethesda, MD, USA) as a gray scale value and shown as the numbers obtained by subtracting background gray values (Ubuka and Bentley, 2009).

## Supplemental Figure S5

### A. 5' upstream region of *GmBCH2*

```

TCTTGCATTG CTATACTCTC GTTGATTAAAT TTAATTTATT TCGCTTACGA AAGCGAGTCA TGAAGTTATA -1490
AAATAC TCAA CT TACAAATA TGATT ACATT ACAAA TTTGA CTACATCCAC TGAATAAGCAT GCACACCGGA -1420
TCAT TT TAAT AT AT TATCGT TAACT GAAAT TTA TTAATAT A TAAATGAA ATATCA TC TC TATATAATA -1350
TCAAAT TTAG TAAA TAAAAA TTCAC AC TCG TTT TATTTAG TAAAATTTGT ATAATT TTTT TTATCAATTA -1280
TATA TA TATA TATA TATAT ATATA TTAAT AACAT TCTTCTTAAA TTAAT GAAC AAAATAACTC -1210
GACAGAAAT TT TAATGTCA CTCAT TAATG TAT GACCTAC AATAGATGA TTAATG TAAA TTAAGTTTGA -1140
GTAT TG TAAA TAAA AAAATGA TTAAG GGAGA ATA TT TACT AATAATAGTT ACTCAGATT TT TTAATAAA -1070
GATT AA TTAC CAAT AAAAAT TATAAAT ATT TTAACA TCAAT GTTATAGTGA AAAAAA TATT AT TAAATATT -1000
TTTT AA TATA TATA TATATA TATAT AT TGA TAT TTATATA T TATTAAT AA AATAAATAT AT ATTTGTACA -930
ATTT CTCTTC AT AT ATCAA TGAAC AC TTT GAC TT GGTGA TATGCTAGTG TACTTTGGGT GAAC TGGTGG -860
GGTGT TATC CC TC ATCAT C AATCC CAACA TCA TT TGTGA GCGTTACATT GGTAGAATT GT TAAATATA -790
CAAT GC TACT TAGA AAAAT C GAAC AAAAT TAA CCATACA TTTTACAT AT TTTAAA TTAG TCACACCAA -720
GTAT AT TATT TG TT TTCAT T TTTTA TAACT TAAACA ACTA TACTCTCTAA TATAGTATAT CATTTCTTAC -650
TTTT AACATA AA TG GAAGA TATTGAGCCA TAT TT AGATT TCTAAAAT TT TGA AAAAGTA AACACATAAA -580
TTCT CT TCTA GAAA AAAAAA CAATT TT TTC ACA GAAATGA AAGAATATCA AACCATATTA ATATGTGTGT -510
AATT TT TAAA AGAG AACGTC TAGAC TC TTC ACT TAACACA CCTTATGCA TTA AAA TTTA TAGAAAATTT -440
AACT AA TTTT AT TA TTTAT TTTAA TGATA TTG TT ATAAA ATATCATT TA TTTATT TTTA ATAACTCTAT -370
TTTT AT TATG AT AT TAAAT T TAAAT AAAAA CCA TT TAAA AATAACTT TA TTTTAT TAAA AATTAATAAA -300
ATTT AA TAA T TCAACTATA TTTT TAATA AGT CT TAAAG T GATTATT TT TGCATT TTTT AT TTCTCTGT -230
TATA GC TAAA AATGACTCCT ATACT GT GGT AAT CT TCCAC GAGCTTTT TC ATTTTG TGTT CACACTGGCC -160
CCAC AT AAAA AAAC CACCGA AGAAA CA AAT TCC ACACATA ACAA AAAAGT TGTGGTCTCT GT TCATCTCC -90
CTTT TT AAA C CT CC ACCT T CAAA C T T T CACAC AAACATCTCT CTCTCTCTCA CTCTCTCTCA -20
TCTC TC TCTC TC TC TCTCTC TAAACA CAC AAA CA CTACA C ATCACAATC TCACAT TGTT CTCAAGTTTC -1
AACACT TTCT AG TT CTACC
    
```

### B. 5' upstream region of *GmBCH3*

```

GGTTGGACAT CTGCAGGCCA AGACTTTACT TAAAT AATGT G TTTTTCATC AAAATAAGAC TGGAACCTGT -1527
CAAAAC TTGA CACT ACCCAA CCTAT TT CTA TTTCTAGATT AACAGTTAGG TTCTTTAGTG CTAGTTGTTA -1457
GGTA TTAGAA TT GC GCTGG A TGAAA GCGTT CAC CGAGCAT CATTTATT TT TTAATT AAGC CAAAAGCTAT -1387
TTGATGAAAT GGTT TTAATG TAAAT TT CTC AAA CAATAAA AAAAAAAT TA GTGTAGGAAAT AAAATTACAG -1317
TAAG TAAAAG CTGT AAGAACT CGGAAA AAAA TGA TG GCGCC AAAAGTTT TT TTCTTAGGAT AATGACCCA -1247
AAGCTT AGAG AC CT ATCTAT TATGAAAAGT CCT CAATCGA ATAGTCCAAT TTTTAAA AACT ACATTCTATC -1177
ACTT CA CACT AAC AAAAAA TTTTAAA CAA CTT TT TTTTG GGAAGAGAAT TTTCTTACTT TGCATGATTA -1107
AATCAA TAA ACAG TACTAT CACTGCAAAA TAAAT TTAGA ATCCTTCT TT TTAATT CAAT AAAAATAGTC -1037
TATC AC TGT TT TT TTAT A TTATA AAA GTA TTC AT GTCAA GAGTAGCAAG AAATGC TTA A GAAATCCTAA -967
CAAGTC CTT TT GT ATTAC TAGGG TGACT CAAGA GACTC ACTCTTAC TG ATTGAA TATA AT TTAGTCTA -897
ATAT CAAA GA TT CAGTTGT TAATA TCAAA GAC CT AATTA TCGTACTT TG GACAA TCCAC TCATTATAGT -827
TGGT TG GCGT AC TT GGA TGC ATAGT CCAACA ATC TC TCAAG TATTGAACAT GAAA GTCGTG GGCAC TTTAT -757
GGTT AAAAAA AT CC TCAAT C GATAT TT AAG TTA TT GTTAT ACTTGACCAA CCAAGT TAAC TAAACCATCC -687
AGAA TC TCA TGT GATGAC TTTAAA GAC AAGAA CATTG TGTATTTAG TGGCAT AATC TTC AATTAAT -617
TTTTAT AAA CT TT TT CAC A TGACC CGTGT AGA TC AAGGC AGATTAAC TT TATCTA TAAA AT TTGATTGA -547
GTTCAA GATC AAAGGCCCAA TTATC TTACT TTGCTAACTT ATTTATTA TG ATCTAT CAAC ATACTTAGAT -477
AAAT GA TCCA TAGT CCGCTCA CACAT TA GAC CTA AAA GACA TAAA GTCGTT GGTATGATTA GTCGATTTT -407
TCTGAT GAGT TTAT GCTTAA TTAGT TG TCG TAT CT GAATG TATTTTGA TT TTTGTAGTTA AAATATTGCT -337
AAAA GA TTT CT AC ATTA A TTTTACC TTT TA TTTCT G TTGAGTCAT AATGTT TTGC TAAATAAAAT -267
GTTA CAATGG GT TT AATGT A ATTAAGA CAA GTG TT GGGTG T GAGATGTA GAGGTT CCA CAGCTATAGT -197
TGTT CCACGA GGTT TAAAT T ATTTT TA TTG AAG TGAACCG ACCAC CAC CTATTGTGCA CAGTACAAA -127
AATT TT GGTG TATAAATATA TGCAACC TCC CTC TC TTCAC AATCATCA CA TCCCTTACTC GCAGGCCAAG -57
ACAAACACTC TC TC TTTGCC TCTTGCCCA ATT CGATCGA AGCTATCTAC CCTTCC -1
    
```

### C

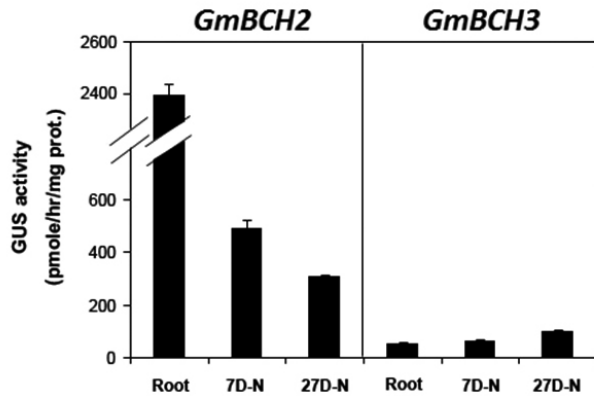



**Suppelemental Figure S5. Expression of p*GmBCH2-GUS* and p*GmBCH3-GUS* in transgenic soybean nodules measured by fluorometric assay of GUS.**

For *GmBCH2-GUS*, a 1,629-bp of 5' upstream region of *GmBCH2* was used (A). For *GmBCH3-GUS*, a 1,596-bp of 5' upstream region of *GmBCH3* was used (B). Primers used in cloning upstream regions are indicated by arrows. (C) Fluorometric GUS activity in transgenic nodules was measured according to Oh et al., (2001). GUS activities in transgenic nodules expressing *GmBCH2-GUS* and *GmBCH3-GUS* are shown as the means and standard deviations of the means of three independent experiments. *GmBCH1* promoter-*GUS* was not examined as the sequence of the *GmBCH1* promoter was not available.

## Supplemental Figure S6

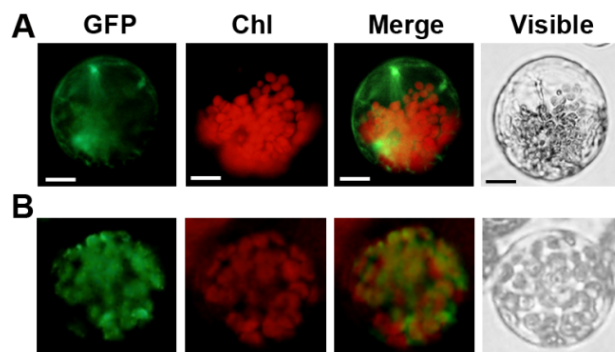

### Supplemental Figure S6. Subcellular localization of N-terminally deleted GmBCH2 and a fusion of GmBCH1 with the transit peptide of GmBCH2.

(A) The 5'-region corresponding to a putative transit peptide was removed from GmBCH2, and the modified GmBCH2 was fused with GFP. (B) The N-terminal region of GmBCH2 containing the putative transit peptide was fused with GmBCH1-GFP fusion construct. The resulting constructs were introduced into *Arabidopsis* protoplasts. After 16 h, transfected protoplasts were examined by fluorescence microscopy. The red signal shows the autofluorescence of chloroplasts (Chl). Scale bar = 10  $\mu$ m.

Supplemental Figure S7

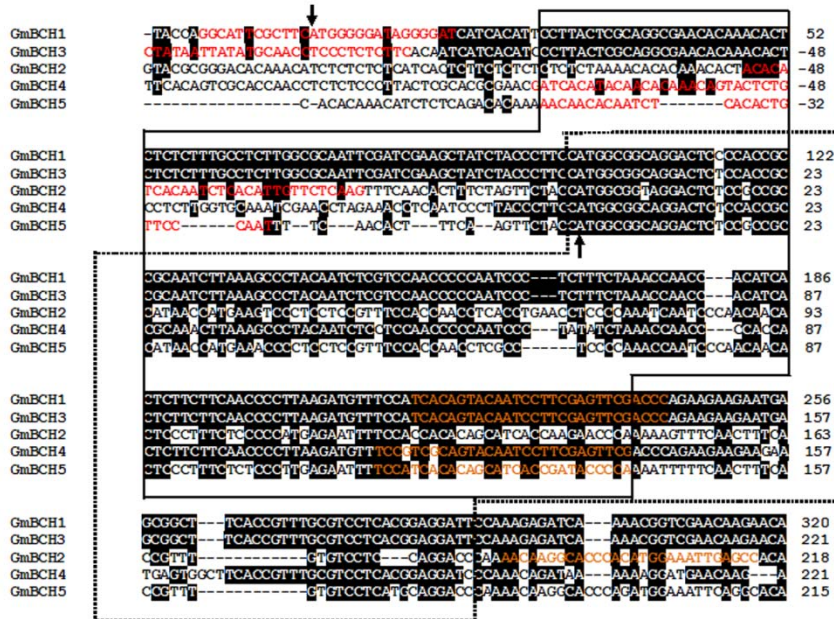

Supplemental Figure S7. DNA sequences used in preparing for *GmBCH(1+3)*-RNAi and *GmBCH2*-RNAi constructs.

DNA sequence alignment of GmBCHs. Boxed areas with a solid line or a dashed line indicate DNA regions used in preparing for *GmBCH(1+3)*-RNAi or *GmBCH2*-RNAi constructs, respectively. Identical DNA sequences in both *GmBCH1* and *GmBCH3* are shaded black. Primers used in real-time PCR are indicated; forward primers for each GmBCHs in red color and reverse in orange color. The exact positions of forward and reverse primers are as follows; *GmBCH1*, -12 to 16 and 216 to 243; *GmBCH3*, -117 to -89 and 117 to 144; *GmBCH2*, -52 to -24 and 188 to 215; *GmBCH4*, -75 to -48 and 113 to 140; *GmBCH5*, -51 to -24 and 113 to 140. Initiation codons are indicated by either downwards arrow (for *GmBCH1*) or upwards arrow (for *GmBCH2*, *GmBCH3*, *GmBCH4* and *GmBCH5*).

## Supplemental Figure S8

**A**

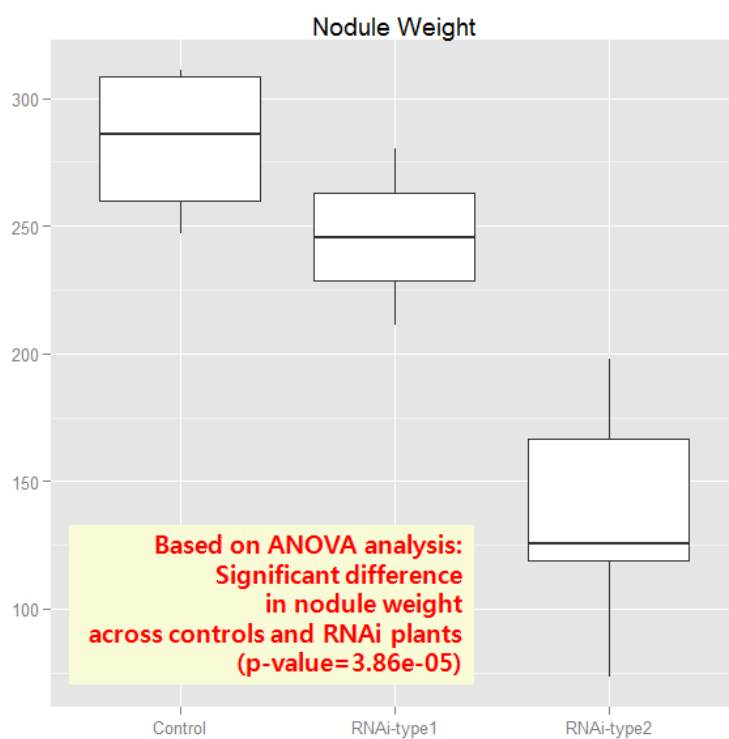

**B**

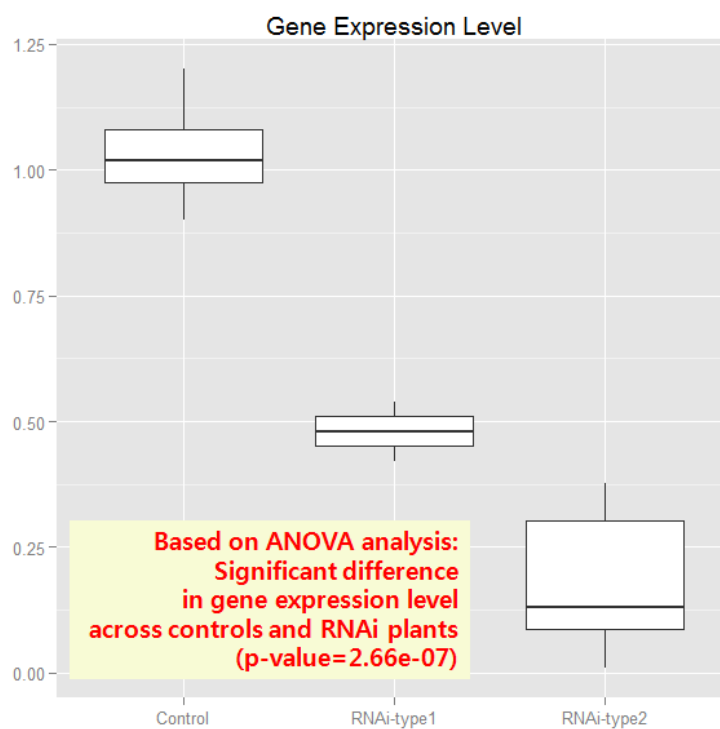

C

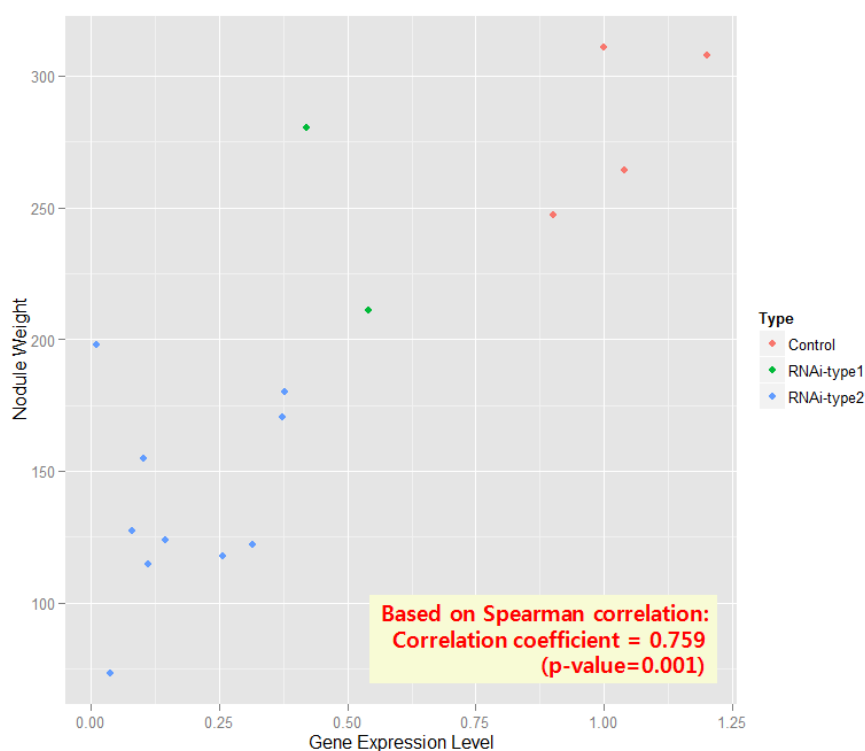

**Supplemental Figure S8. Statistical analyses of nodule weight and gene expression in *GmBCH(1+3)*-RNAi nodules.**

(A) Distribution of nodule weight between three plant groups. We compared nodule weights of those plants, and broken transgenic plants into two groups (say RNAi-type1 = transgenic plants with nodule weight similar to controls, including #2; RNAi-type2 = transgenic plants with nodule weight significantly smaller than controls, including #20, #21). In order to verify the statistical significance of this grouping (i.e., control vs RNAi-type1 vs RNAi-type2), we conducted analysis of variance (ANOVA) with Tukey's multiple comparison procedure, and found significant difference in nodule weight between control and RNAi-type2 (p-value = 0.00005) as well as between RNAi-type1 and RNAi-type2 (p-value = 0.00636), but not between control and RNAi-type1 (p-value = 0.5). (B) Distribution of gene expression level between three plant groups. We conducted ANOVA with Tukey's multiple comparison procedure for difference in gene

expression levels between three groups, and found that significant difference between each pair of groups: control and RNAi-type1 (p-value = 0.00083), control and RNAi-type2 (p-value = 0.0000002), RNAi-type1 and RNAi-type2 (p-value = 0.0294). Based on the results of two ANOVAs, we verified the significance of our grouping and characterized two groups of transgenic plants as follows: RNAi-type1 = no significant decrease in nodule weight with considerably reduced gene expression; RNAi-type2 = significant decrease in nodule weight with completely reduced gene expression. (C) Correlation between nodule weight and gene expression level. Using all of the 16 plants in three groups, we examined the correlation between gene expression levels and nodule weights based on Spearman rank correlation coefficient. Strong positive correlation of 0.76 (p-value = 0.001) was observed. Note that we used Spearman rank correlation, a popular correlation measure that can deal with small sample size and requires no normality assumption.

## Supplemental Figure S9

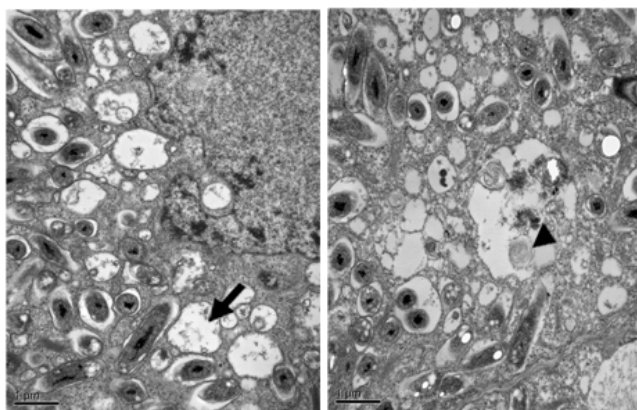

*GmBCH(1+3)*-RNAi

### Supplemental Figure S9. Electron microscopic analysis of *GmBCH(1+3)*-RNAi nodules.

*GmBCH(1+3)*-RNAi nodules often contained empty vesicles without bacteroids (arrow) and in severe case, bacteroids without being enclosed by symbiosome membranes (arrowhead).



## Supplemental Figure S10

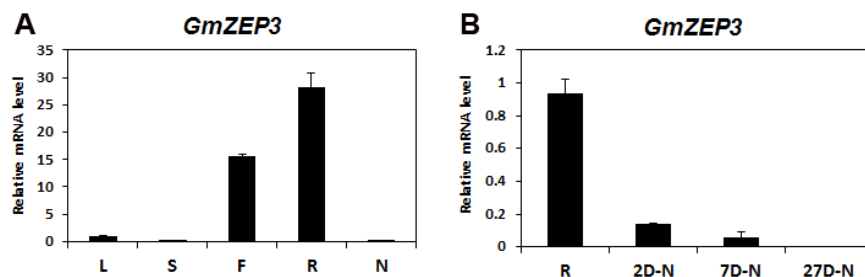

### Supplemental Figure S10. Expression of *GmZEP3* in *Glycine max*.

(A) Expression of *GmZEP3* in different tissues. RNA was extracted from different tissues including 27-day-old nodules of *Glycine max*. (B) Expression of *GmZEP3* during nodule development. RNAs were extracted from roots, 2-, 7-, and 27-day-old nodules, and transcript levels were determined by real time RT-PCR and normalized. Data are from three independent experiments. L, leaf; S, stem; F, flower; R, root, N, Nodule.

## Supplemental Figure S11

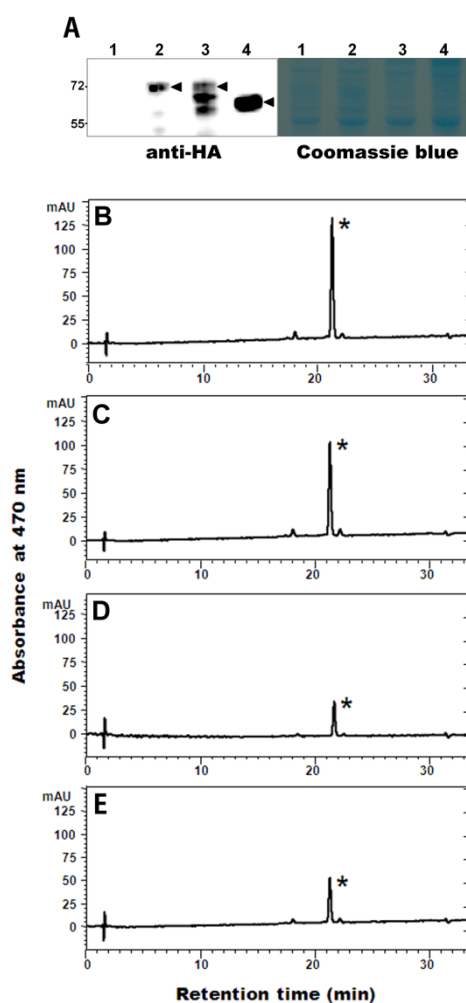

**Supplemental Figure S11. Functional assay of GmCCD7 and GmCCD8 in  $\beta$ -carotene-accumulating *E. coli*.**

Expression of *GmCCD7*, *GmCCD8*, and *AtCCD7* in *E. coli* strains that carry pACCAR16 $\Delta$ crtX and accumulate  $\beta$ -carotene. The  $\beta$ -carotene-accumulating *E. coli* strain with empty vector alone served as negative control. (A) Proteins from  $\beta$ -carotene-accumulating *E. coli* cells expressing *HA-GmCCD7* (lane 2), *HA-AtCCD7* (lane 3) and *HA-GmCCD8* (lane 4) or with empty vector alone (lane 1) were isolated (right panel) and immunoblotted with HA antibody (left panel). Proteins of the expected sizes corresponding to *GmCCD7* (70 kDa), *AtCCD7* (72 kDa) and *GmCCD8* (60 kDa) were

detected. Immunodetected bands were indicated by arrowheads. HPLC analysis of carotenoids extracted from  $\beta$ -carotene-accumulating *E. coli* cells expressing *HA-GmCCD7* (C), *HA-AtCCD7* (D) and *HA-GmCCD8* (E) or with empty vector alone (B). The  $\beta$ -carotene peak is indicated by an asterisk (\*). mAU, milli-absorbance units.

**Supplemental Table S1.** RNA-seq expression data for soybean genes in various tissues. The expression levels were shown according to Severin et al. (2010) (A) and Libault et al. (2010) (B)

(A) RNA-seq expression data for soybean genes from Severin et al. (2010)

| Gene name in the paper | Gene model #  | young_leaf | flower | root | nodule |
|------------------------|---------------|------------|--------|------|--------|
| GmBCH2                 | Glyma16g29790 | 45         | 12     | 8    | 7      |
| GmBCH3                 | Glyma10g37560 | 2          | 32     | 7    | 4      |
| GmBCH4                 | Glyma20g30230 | 2          | 2      | 2    | 1      |
| GmBCH5                 | Glyma09g24530 | 15         | 5      | 0    | 0      |
| GmZEP1                 | Glyma17g20020 | 46         | 18     | 0    | 0      |
| GmZEP2                 | Glyma11g05960 | 1          | 6      | 3    | 1      |
| GmZEP3                 | Glyma01g39310 | 0          | 0      | 0    | 0      |
| GmVDE1                 | Glyma03g41420 | 9          | 7      | 0    | 0      |
| GmVDE2                 | Glyma19g44010 | 14         | 4      | 1    | 0      |
| GmNCED1a               | Glyma05g27250 | 0          | 1      | 0    | 0      |
| GmNCED1b               | Glyma08g10190 | 0          | 129    | 0    | 3      |
| GmCCD1a                | Glyma12g36530 | 2          | 2      | 1    | 0      |
| GmCCD1b                | Glyma13g27220 | 15         | 19     | 12   | 11     |
| GmCCD7a                | Glyma11g16370 | 0          | 0      | 4    | 0      |
| GmCCD7b                | Glyma01g14170 | 0          | 0      | 13   | 0      |
| GmCCD8a                | Glyma06g09000 | 0          | 0      | 33   | 1      |
| GmCCD8b                | Glyma04g08910 | 0          | 0      | 19   | 3      |

(B) RNA-seq expression data for soybean genes from Libault et al. (2010)

| Gene name in the paper | Gene model #  | leaf | flower | root | nodule |
|------------------------|---------------|------|--------|------|--------|
| GmBCH2                 | Glyma16g29790 | 33   | 14     | 17   | 9      |
| GmBCH3                 | Glyma10g37560 | 14   | 40     | 8    | 2      |
| GmBCH4                 | Glyma20g30230 | 15   | 0      | 3    | 1      |
| GmBCH5                 | Glyma09g24530 | 2    | 3      | 1    | 0      |
| GmZEP1                 | Glyma17g20020 | 886  | 273    | 0    | 0      |
| GmZEP2                 | Glyma11g05960 | 11   | 6      | 5    | 2      |
| GmZEP3                 | Glyma01g39310 | 0    | 1      | 0    | 0      |
| GmVDE1                 | Glyma03g41420 | 77   | 47     | 1    | 1      |
| GmVDE2                 | Glyma19g44010 | 58   | 36     | 3    | 0      |
| GmNCED1a               | Glyma05g27250 | 0    | 1      | 0    | 0      |
| GmNCED1b               | Glyma08g10190 | 1    | 469    | 0    | 1      |

|         |               |     |    |    |    |
|---------|---------------|-----|----|----|----|
| GmCCD1a | Glyma12g36530 | 16  | 8  | 0  | 1  |
| GmCCD1b | Glyma13g27220 | 212 | 79 | 35 | 34 |
| GmCCD7a | Glyma11g16370 | 0   | 0  | 7  | 0  |
| GmCCD7b | Glyma01g14170 | 0   | 0  | 3  | 0  |
| GmCCD8a | Glyma06g09000 | 0   | 0  | 17 | 0  |
| GmCCD8b | Glyma04g08910 | 0   | 0  | 9  | 9  |

**Supplemental Table S2.** Primers used for gene cloning (A) and gene expression by real time RT-PCR (B)

(A) Primers for gene cloning

| Gene           | Primer sequence (5'-3')                                                                                                                                                        | Purpose                                                              |
|----------------|--------------------------------------------------------------------------------------------------------------------------------------------------------------------------------|----------------------------------------------------------------------|
| <i>GmBCH2</i>  | 5'-RACE : GTCTACCAGGCATTCGCTTCAT<br>Gene-specific R: GTTAAAGAAACCATAGGAAAGGAGAGCG                                                                                              | Isolation of the 5' region of <i>GmBCH2</i>                          |
|                | F: CTAGTCTAGACATGGCGGTAGGACTCTC<br>R: CATTCTGGATCCGTATTAGTTGTTCTCA                                                                                                             | Isolation of the full-length <i>GmBCH2</i> cDNA                      |
|                | F: CTAGTCTAGACATGGCGGTAGGACTCTC<br>R: TGATTGGATCCAGTTGTTCTCATTAGC                                                                                                              | Construct for subcellular localization                               |
|                | F: CTA CTCTAGAAATGGCGGCAGGACTCTCC<br>R: TTGGCGGATCCA TGA ACCGGACCTGATGC                                                                                                        | Cloning of N-terminal end- deleted <i>GmBCH2</i>                     |
|                | F: CTATCTAG ACC ATGGCGGTAGGACTCTC<br>R: AAGTTTCTAGATTTTGGGTTCTGGTGA                                                                                                            | Cloning of N-terminal region of <i>GmBCH2</i> fused to <i>GmBCH1</i> |
|                | Sense F: CTCTCTAGAACACACAAAACACTACACAT<br>Sense R: GGTC AAGCTTGAGGACACAAAACGGTGAA<br>Antisense F: TCTCTCGAGAACACACAAAACACTACACA<br>Antisense R: TTTGGTACCTGCATGAGGACACAAAACGGT | Construct for <i>GmBCH2</i> -RNAi                                    |
|                | F: CTCACAAGCTTTCTTGGATTGCTATACTCTCGTTG<br>R: ACCGCCATGGTAGA ACTAGAAAAGTGTGAAACTTG                                                                                              | Isolation of <i>GmBCH2</i> promoter                                  |
|                | F1: GTAAAGTTTGATACTTTCACTCCTGCG<br>R1: GAAACAAAAGTACTGTTTGTGTCCCAAG                                                                                                            | Isolation of a part of <i>GmZEP</i>                                  |
|                | 5'-RACE: GTCTACCAGGCATTCGCTTCAT<br>R2: ACTGCAGG AGTGAATGTATCAAAAATTGA                                                                                                          | Isolation of the 5' region of <i>GmZEP</i>                           |
|                | F2: TGCCTGCTGACATTGAAACTGTTGGATA<br>3'-RACE: TCGTAGTCGCAGCATTACACAG                                                                                                            | Isolation of the 3' region of <i>GmZEP</i>                           |
| <i>GmBCH1</i>  | F: GGCATTCTAGACATGGGGGATAGGGGAT<br>R: GAACCCTAGGAGTACTTGGCCTGG                                                                                                                 | Isolation of the full-length <i>GmBCH1</i> cDNA                      |
|                | F: GGCATTCTAGACATGGGGGATAGGGGAT<br>R: TTGGCGGATCCATGAACCGACCTGATG                                                                                                              | Construct for subcellular localization                               |
|                | Sense F: GATCTCTAGATTCCCTTACTCGCAGGCCG<br>Sense R: ACTCGAAGCTTTGTACTGTGATGGAAACA<br>Antisense F: GATCATCTCGAGCCTTACTCGCAGGCCGAA<br>Antisense R: ACT CGAAGGTACCTACTGTGATGGAAACA | Construct for <i>GmBCH(1+3)</i> -RNAi                                |
|                | F: CTATCTAGACATGGCGGCAGGACTCTCC<br>R: GAACCCTAGGAGTACTTGGCCTGG                                                                                                                 | Isolation of the full-length <i>GmBCH3</i> cDNA                      |
| <i>GmBCH3</i>  | F: CTACTTAGAATGGCGGCAGGACTCTCC<br>R: TTGGCGGATCCATGAACCGACCTGATGC-3                                                                                                            | Construct for subcellular localization                               |
|                | F: TAACAAGCTTGGTTGGACATGTGCAGGCCAAGA<br>R: CCGCCATGGAAGGGTAGATGCTTCGATCGAAT                                                                                                    | Isolation of <i>GmBCH3</i> promoter                                  |
|                | F: ACTCAAGCTTAATGCAAGCCAAACCCATT<br>R: TTGGGATCCAGCTAATTAGCTGCCCG                                                                                                              | Isolation of the full-length <i>GmCCD7a</i> cDNA                     |
| <i>GmCCD8a</i> | F: CATGTCTAGATATGCTTGTTCCTGACATGCCTCATAACA<br>R: TAGGGATCCCTACTCTTTTGGAAACCAGCATCCATGC                                                                                         | Isolation of the full-length <i>GmCCD8a</i> cDNA                     |
| <i>AtCCD7</i>  | F: GTTTC TAGAGATGTCTCTCCCTATCCCGCCGAAATTC<br>R: AGAAGGATCCAGCTTGTGCTTTGCCAATCAT                                                                                                | Isolation of the full-length <i>AtCCD7</i> cDNA                      |

(B) Primers for gene expression by real time RT-PCR

| Gene          | Primer sequence (5'-3')                                             | Efficiency* |
|---------------|---------------------------------------------------------------------|-------------|
| <i>GmBCH1</i> | F: GGCATTCTAGACATGGGGGATAGGGGAT<br>R: GGGTCGAACTCGAAGGATTGTACTGTGA  | 90.1%       |
| <i>GmBCH2</i> | F: ACACATCACAATCTCACATTGTTCTCAAG<br>R: GGCTCAATTTCCATGTGGGTGCCTTGTT | 96.7%       |
| <i>GmBCH3</i> | F: CTATAATTATATGCAACCTCCCTCTCTTC<br>R: GGGTCGAACTCGAAGGATTGTACTGTGA | 102.7%      |

|                      |                                                                     |        |
|----------------------|---------------------------------------------------------------------|--------|
| <i>GmBCH4</i>        | F: GATCACATACAACACAAACAGTACTCTG<br>R: CGAACTCGAAGGATTGTA CTGCGACGGA | 89.5%  |
| <i>GmBCH5</i>        | F: AACAAACACAATCTCACACTGTTCCCAAT<br>R: TGGGGTATCGGTGATGCTGTGTGATGGA | 90.1%  |
| <i>GmZEP(1+2)</i>    | F: GTAAAGTTTGATACTTTCACCTGCG<br>R: GAAACAAAGTACTGTTTGITGCCAAG       | 100.4% |
| <i>GmZEP3</i>        | F: GCCGTTGATATTACTTATCTTGTAAGT<br>R: ATCACGCTAGGGCGCTTATGAGTACATA   | 98.1%  |
| <i>GmVDE(1+2)</i>    | F: GCTATCAAGATGACTGGTATATTTTGTC<br>R: CACCTCTTCTTCTAACTGTTCAACTTCC  | 91.0%  |
| <i>GmNCED(1a+1b)</i> | F: ACCACCTCTTCGACGGCGACGGAATGGT<br>R: ATGGCGAGGAGTTTTCCGTTGAAGAAGA  | 89.2%  |
| <i>GmCCD(1a+1b)</i>  | F: GGAACCACATTAGACAGCATTGCAAAAAGT<br>R: TCAAGTATCCATCATCTTCTCAGAATC | 92.3%  |
| <i>GmCCD(7a+7b)</i>  | F: ATCACGGGTCCACGGTGCACCCTCTA<br>R: GTGTTAGCCCAATTTTCATGACCTTAGT    | 96.0%  |
| <i>GmCCD(8a+8b)</i>  | F: AGGAATGGTCCGGGCATGTGGCACATA<br>R: TTCGCCGCCTTAGGCACCTCGGAGAACT   | 92.7%  |
| <i>GmLbc</i>         | F: ATGGGTGCTTTCACTGAGAAGCAAGAGG<br>R: TGCTGCTGCCAATTCATCATAGGCTACT  | 102.7% |
| <i>Ubiquitin</i>     | F: GGGTTTTAAGCTCGTTGT<br>R: GGACACATTGAGTTCAAC                      | 104.2% |
| <i>GmELF1b</i>       | F: GTTGAAAAGCCAGGGGACA<br>R: TCTTACCCCTTGAGCGTGG                    | 89.7%  |
| <i>GmActin2/7</i>    | F: CTTCCCTCAGCACCTTCCAA<br>R: GGTCCAGCTTTCACACTCCAT                 | 90.5%  |

\*The efficiency of the primer sets used for *GmBCHs* was tested by plotting the threshold cycle (*C<sub>t</sub>*) at each concentration of the samples. The slope of the linear-regression trendline indicates the primer efficiency. PCR efficiency of primer sets was calculated as  $[10^{(-1/S)} - 1] \times 100\%$ , where S is the slope of the regression line (Hu et al., 2009).
